# Supplementary material for: Iodine-mediated synthesis of benzopyridothiazines via tandem C–H thiolation and amination
Source: Royal Society of Chemistry journal article supplement (doi:10.1039/c5ra22855g), 2015-01-01

# Supporting Information

## Iodine-Mediated Synthesis of Benzopyridothiazines via Tandem C–H Thiolation and Amination

Liang Wei,<sup>a,b</sup> Li Xu<sup>b</sup> and Ri-Yuan Tang<sup>\*a,b</sup>

<sup>a</sup> College of Chemistry and Materials engineering, Wenzhou University, Wenzhou, 325035, China

<sup>b</sup> Department of Applied Chemistry, College of Materials and Energy, South China Agricultural University, Guangzhou 510642, China.

[rytang@scau.edu.cn](mailto:rytang@scau.edu.cn)

### List of Contents

|                                                                         |              |
|-------------------------------------------------------------------------|--------------|
| <b>1. General information</b>                                           | <b>2</b>     |
| <b>2. Typical Experimental Procedure</b>                                | <b>2</b>     |
| <b>3. Control Experiments</b>                                           | <b>2</b>     |
| <b>4. NMR study for the mixture of I<sub>2</sub> and intermediate B</b> | <b>2–12</b>  |
| <b>5. NMR Spectra for products 3a–3t and intermediate B</b>             | <b>13–41</b> |

## 1. General Information

$^1\text{H}$  and  $^{13}\text{C}$  NMR spectra were measured on a Bruker Avance-III 500 instrument (500 MHz for  $^1\text{H}$ , 125 MHz for  $^{13}\text{C}$  NMR spectroscopy) using  $\text{CDCl}_3$  as the solvent. Chemical shifts for  $^1\text{H}$  and  $^{13}\text{C}$  NMR were referred to internal  $\text{Me}_4\text{Si}$  (0 ppm) as the standard. Mass spectra were measured on a Shimadzu GC-MS-QP2010 Plus spectrometer (EI). HRMS (ESI) analysis was measured on a Bruker micrOTOF-Q II instrument. The following abbreviations (or combinations thereof) were used to explain multiplicities: s = singlet, d = doublet, t = triplet, q = quartet, m = multiplet. IR analysis was measured on Nicolet IS10 spectrometer (ATR).

## 2. Typical Experimental Procedure

To a flame-dried Schlenk tube with a magnetic stirring bar was charged with **1a** (0.2 mmol), **2a** (0.15 mmol),  $\text{FeF}_3$  (0.04 mmol),  $\text{I}_2$  (0.04 mmol) in  $\text{CH}_3\text{NO}_2$  (2 mL) under air atmosphere. The reaction mixture was stirred at 80 °C for the indicated time. After the reaction finished, the mixture was poured into ethyl acetate, washed with saturated  $\text{Na}_2\text{S}_2\text{O}_3$  and then brine. The aqueous layer was extracted with ethyl acetate, the combined organic layers were dried over anhydrous  $\text{Na}_2\text{SO}_4$  and evaporated under vacuum. The residue was purified by flash column chromatography (hexane/ethyl acetate) to afford the desired product **3a**.

## 3. Control experiments

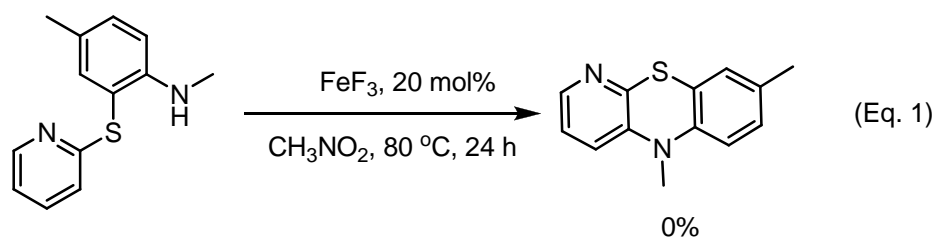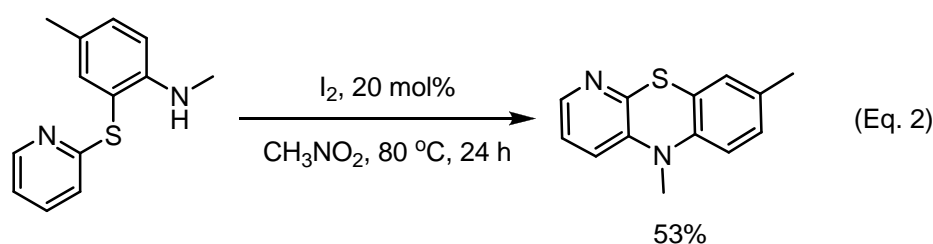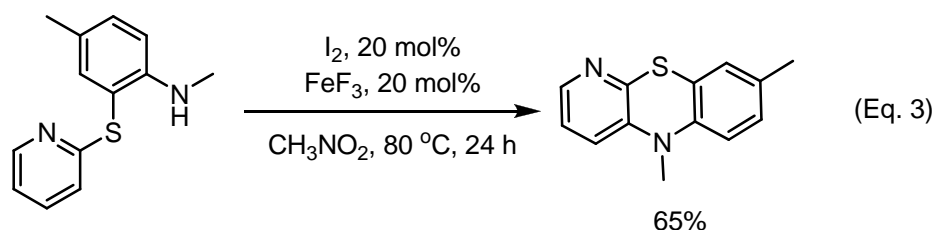

#### 4. NMR study for the mixture of I<sub>2</sub> and intermediate B

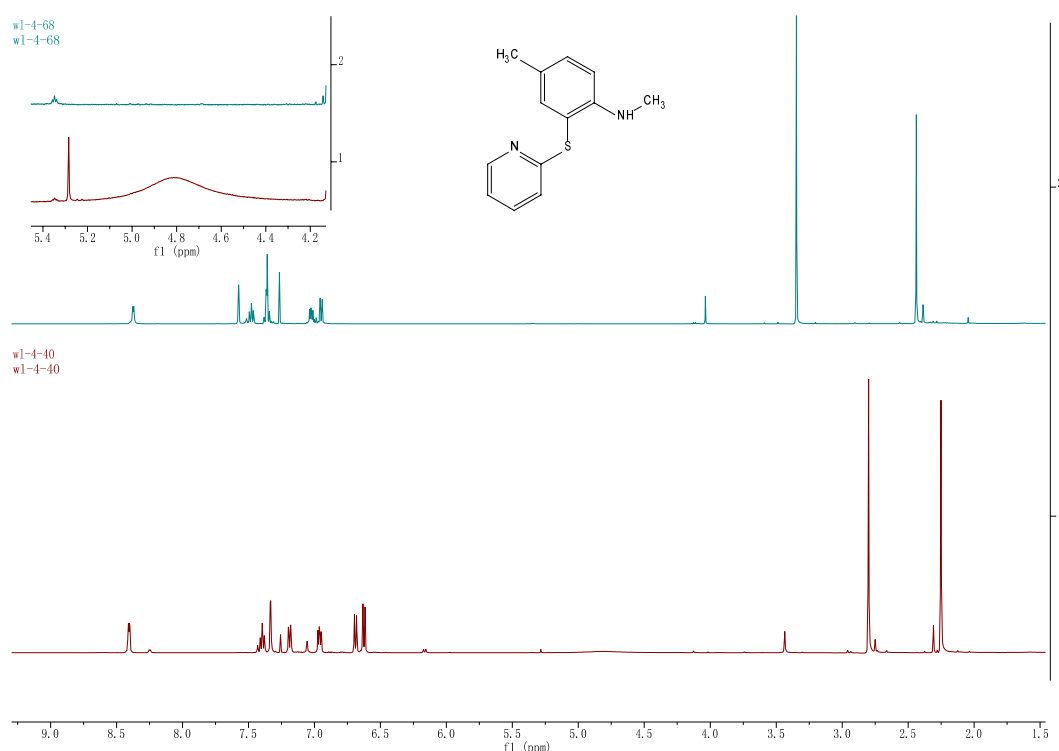

Note: the spectra in blue (w1-4-68): The mixture of **1a** and I<sub>2</sub> (1 equiv.) in CD<sub>3</sub>CN at room temperature, stir for 24 hours. The spectra in red (w1-4-40): **1a** in CD<sub>3</sub>CN at room temperature, stir for 24 hours.

#### 5. NMR data and spectra for products 3a–3t and intermediate B

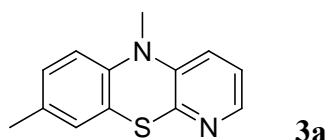

##### 5,8-dimethyl-5H-benzo[b]pyrido[3,2-e][1,4]thiazine (**3a**):

Yield: 28 mg (63%). Yellow solid, mp 88.6–90.3 °C. <sup>1</sup>H NMR (500 MHz, CDCl<sub>3</sub>) δ 8.02 (d, *J* = 4.8 Hz, 1H), 7.28 (s, 1H), 6.96 (d, *J* = 8.2 Hz, 1H), 6.90 (s, 1H), 6.77 – 6.72 (m, 2H), 3.43 (s, 3H), 2.24 (s, 3H). <sup>13</sup>C NMR (125 MHz, CDCl<sub>3</sub>) δ 154.6, 144.1, 140.7, 133.0, 131.5, 127.2, 126.3, 119.7, 116.4, 116.1, 113.5, 32.3, 19.2. LRMS (EI, 70 eV) *m/z* (%): 228 (100), 213 (48), 227 (35), 195 (31), 229 (16) HRMS (ESI) for C<sub>13</sub>H<sub>13</sub>N<sub>2</sub>S [M+H]<sup>+</sup>: calcd 229.0794, found 229.0798. IR (ATR, cm<sup>-1</sup>): 3649, 3563, 1570, 1404, 1145, 812, 794, 764.

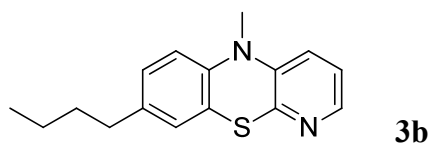

##### 8-butyl-5-methyl-5H-benzo[b]pyrido[3,2-e][1,4]thiazine (**3b**):

Yield: 35 mg (64%). Brown oil.  $^1\text{H}$  NMR (500 MHz,  $\text{CDCl}_3$ )  $\delta$  8.02 (d,  $J = 4.6$  Hz, 1H), 7.26 (d,  $J = 7.4$  Hz, 1H), 6.96 (d,  $J = 8.2$  Hz, 1H), 6.90 (s, 1H), 6.74 (d,  $J = 7.6$  Hz, 2H), 3.42 (s, 3H), 2.49 (t,  $J = 7.6$  Hz, 2H), 1.55 (m, 2H), 1.32 (m, 2H), 0.91 (t,  $J = 7.3$  Hz, 3H).  $^{13}\text{C}$  NMR (125 MHz,  $\text{CDCl}_3$ )  $\delta$  155.6, 145.1, 141.9, 137.7, 134.0, 127.6, 126.7, 120.7, 117.4, 117.2, 114.6, 34.5, 33.5, 33.3, 22.2, 13.9. LRMS (EI, 70 eV)  $m/z$  (%): 270 (95), 227 (100), 271 (17), 228 (15), 212 (10). HRMS (ESI) for  $\text{C}_{16}\text{H}_{19}\text{N}_2\text{S}$   $[\text{M}+\text{H}]^+$ : calcd 271.1263, found 271.1266. IR (ATR,  $\text{cm}^{-1}$ ): 3649, 2914, 1546, 1434, 1394, 1139, 812, 766.

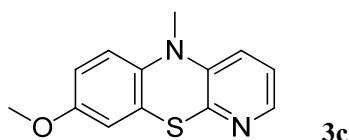

**8-methoxy-5-methyl-5H-benzo[b]pyrido[3,2-e][1,4]thiazine (3c):**

Yield: 32 mg (65%). Brown oil.  $^1\text{H}$  NMR (500 MHz,  $\text{CDCl}_3$ )  $\delta$  8.03 (d,  $J = 4.8$  Hz, 1H), 7.28 (d,  $J = 7.5$  Hz, 1H), 6.78 (d,  $J = 8.8$  Hz, 1H), 6.75 (d,  $J = 5.4$  Hz, 1H), 6.73 (d,  $J = 3.0$  Hz, 1H), 6.69 (s, 1H), 3.76 (s, 3H), 3.42 (s, 3H).  $^{13}\text{C}$  NMR (125 MHz,  $\text{CDCl}_3$ )  $\delta$  155.8, 145.1, 137.7, 134.1, 122.2, 121.2, 117.3, 116.8, 115.3, 114.6, 112.8, 55.7, 33.5. LRMS (EI, 70 eV)  $m/z$  (%): 244 (100), 229 (79), 201 (26), 186 (19), 245 (16). HRMS (ESI) for  $\text{C}_{13}\text{H}_{13}\text{ON}_2\text{S}$   $[\text{M}+\text{H}]^+$ : calcd 245.0743, found 245.0736. IR (ATR,  $\text{cm}^{-1}$ ): 3556, 2855, 2352, 1550, 1394, 1248, 1023, 870.

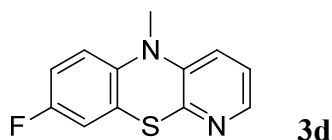

**8-fluoro-5-methyl-5H-benzo[b]pyrido[3,2-e][1,4]thiazine (3d):**

Yield: 19 mg (41%). Light yellow solid, mp 69.8–71.2 °C.  $^1\text{H}$  NMR (500 MHz,  $\text{CDCl}_3$ )  $\delta$  8.05 (d,  $J = 4.8$  Hz, 1H), 7.28 (d,  $J = 7.4$  Hz, 1H), 6.85 (dd,  $J = 16.8, 8.1$  Hz, 2H), 6.81 – 6.74 (m, 2H), 3.42 (s, 3H).  $^{13}\text{C}$  NMR (125 MHz,  $\text{CDCl}_3$ )  $^{13}\text{C}$  NMR (126 MHz,  $\text{CDCl}_3$ )  $\delta$  158.9 (d,  $J_{\text{C-F}} = 254.6$  Hz), 155.4, 145.5, 140.5 (d,  $J_{\text{C-F}} = 2.4$  Hz), 134.2, 122.9 (d,  $J_{\text{C-F}} = 8.3$  Hz), 117.8, 116.3, 115.2 (d,  $J_{\text{C-F}} = 8.3$  Hz), 114.0 (d,  $J_{\text{C-F}} = 3.2$  Hz), 113.8, 33.6. LRMS (EI, 70 eV)  $m/z$  (%): 232 (100), 217 (57), 231 (41), 199 (33), 233 (16). HRMS (ESI) for  $\text{C}_{12}\text{H}_{10}\text{FN}_2\text{S}$   $[\text{M}+\text{H}]^+$ : calcd 233.0542 found 233.0548. IR (ATR,  $\text{cm}^{-1}$ ): 3636, 2908, 1497, 1430, 1407, 1268, 859, 767.

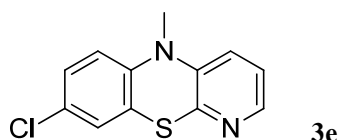

**8-chloro-5-methyl-5H-benzo[b]pyrido[3,2-e][1,4]thiazine (3e):**

Yield: 25 mg (50%). Yellow solid, mp 105.4–107.1 °C.  $^1\text{H}$  NMR (500 MHz,  $\text{CDCl}_3$ )  $\delta$  8.05 (d,  $J = 4.9$  Hz, 1H), 7.28 (d,  $J = 7.5$  Hz, 1H), 7.14 – 7.10 (m, 1H), 7.06 (d,  $J = 2.1$  Hz, 1H), 6.79 (d,  $J = 7.4$  Hz, 1H), 6.75 (d,  $J = 8.7$  Hz, 1H), 3.42 (s, 3H).  $^{13}\text{C}$  NMR

(125 MHz, CDCl<sub>3</sub>)  $\delta$  155.1, 145.5, 143.0, 134.3, 128.0, 127.5, 126.4, 122.8, 118.0, 116.4, 115.4, 33.5. LRMS (EI, 70 eV)  $m/z$  (%): 248 (100), 233 (44), 350 (37), 247 (32), 213 (31). HRMS (ESI) for C<sub>12</sub>H<sub>10</sub>ClN<sub>2</sub>S [M+H]<sup>+</sup>: calcd 249.0248, found 249.0255. IR (ATR, cm<sup>-1</sup>): 3748, 3655, 2338, 1427, 1401, 1142, 804, 792.

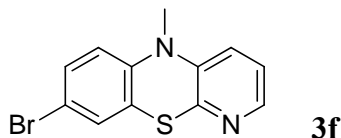

**8-bromo-5-methyl-5H-benzo[b]pyrido[3,2-e][1,4]thiazine (3f):**

Yield: 23 mg (40%). Light grey solid, mp 122.9–124.2 °C. <sup>1</sup>H NMR (500 MHz, CDCl<sub>3</sub>)  $\delta$  8.04 (dd,  $J$  = 4.8, 1.3 Hz, 1H), 7.29 – 7.23 (m, 2H), 7.18 (d,  $J$  = 2.1 Hz, 1H), 6.79 (dd,  $J$  = 7.4, 5.0 Hz, 1H), 6.68 (d,  $J$  = 8.7 Hz, 1H), 3.41 (s, 3H). <sup>13</sup>C NMR (125 MHz, CDCl<sub>3</sub>)  $\delta$  155.0, 145.4, 143.5, 134.3, 130.4, 129.1, 123.2, 118.0, 116.4, 115.8, 115.2, 33.4. LRMS (EI, 70 eV)  $m/z$  (%): 292 (100), 294 (99), 213 (80), 279 (34), 277 (34). HRMS (ESI) for C<sub>12</sub>H<sub>10</sub>BrN<sub>2</sub>S [M+H]<sup>+</sup>: calcd 292.9743, found 292.9753. IR (ATR, cm<sup>-1</sup>): 3642, 2345, 1662, 1480, 1430, 1145, 796, 758.

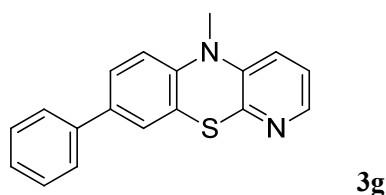

**5-methyl-8-phenyl-5H-benzo[b]pyrido[3,2-e][1,4]thiazine (3g):**

Yield: 40 mg (69%). Grey solid, mp 116.8–118.3 °C. <sup>1</sup>H NMR (500 MHz, CDCl<sub>3</sub>)  $\delta$  8.03 (dd,  $J$  = 4.9, 1.3 Hz, 1H), 7.50 (d,  $J$  = 7.6 Hz, 2H), 7.42 – 7.35 (m, 3H), 7.31 – 7.26 (m, 3H), 6.88 (d,  $J$  = 8.4 Hz, 1H), 6.75 (dd,  $J$  = 7.4, 5.0 Hz, 1H), 3.46 (s, 3H). <sup>13</sup>C NMR (125 MHz, CDCl<sub>3</sub>)  $\delta$  155.2, 145.2, 143.4, 139.7, 136.1, 134.2, 128.8, 127.2, 126.5, 126.3, 125.3, 121.4, 117.8, 117.0, 115.0, 33.4. LRMS (EI, 70 eV)  $m/z$  (%): 290 (100), 275 (35), 289 (29), 291 (22), 257 (15). HRMS (ESI) for C<sub>18</sub>H<sub>15</sub>N<sub>2</sub>S [M+H]<sup>+</sup>: calcd 291.0950, found 291.0955. IR (ATR, cm<sup>-1</sup>): 3655, 2339, 1544, 1427, 1398, 1136, 820, 754.

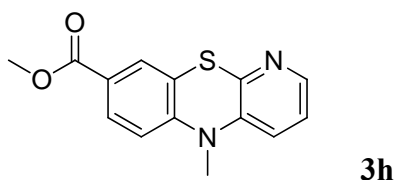

**methyl 5-methyl-5H-benzo[b]pyrido[3,2-e][1,4]thiazine-8-carboxylate (3h):**

Yield: 17 mg (32%). Yellow solid, mp 120.7–122.0 °C. <sup>1</sup>H NMR (500 MHz, CDCl<sub>3</sub>)  $\delta$  8.04 (dd,  $J$  = 4.9, 1.5 Hz, 1H), 7.83 (dd,  $J$  = 8.5, 1.9 Hz, 1H), 7.72 (d,  $J$  = 1.9 Hz, 1H), 7.28 (m, 1H), 6.85 – 6.80 (m, 2H), 3.88 (s, 3H), 3.47 (s, 3H). <sup>13</sup>C NMR (125 MHz, CDCl<sub>3</sub>)  $\delta$  166.2, 154.4, 148.2, 145.4, 134.3, 129.8, 128.0, 124.6, 120.8, 118.6, 116.8, 114.0, 52.0, 33.6. LRMS (EI, 70 eV)  $m/z$  (%): 272 (100), 213 (26), 241(20),

273 (20), 257 (17). HRMS (ESI) for  $C_{14}H_{13}N_2O_2S$   $[M+H]^+$ : calcd 273.0692, found 273.0722. IR (ATR,  $cm^{-1}$ ): 3669, 2345, 1709, 1424, 1298, 1116, 787, 761.

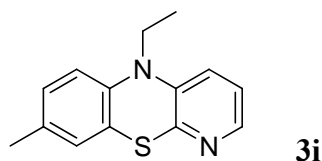

**5-ethyl-8-methyl-5H-benzo[b]pyrido[3,2-e][1,4]thiazine (3i):**

Yield: 19 mg (41%). Yellow oil.  $^1H$  NMR (500 MHz,  $CDCl_3$ )  $\delta$  7.97 (d,  $J = 4.3$  Hz, 1H), 7.19 (d,  $J = 7.4$  Hz, 1H), 6.92 (d,  $J = 8.2$  Hz, 1H), 6.84 (s, 1H), 6.77 (d,  $J = 8.3$  Hz, 1H), 6.69 (t,  $J = 5.9$  Hz, 1H), 4.12 – 4.07 (m, 2H), 2.22 (s, 3H), 1.38 (t,  $J = 6.8$  Hz, 3H).  $^{13}C$  NMR (125 MHz,  $CDCl_3$ )  $\delta$  154.9, 144.9, 140.2, 133.8, 132.3, 128.0, 127.4, 120.8, 117.3, 116.7, 115.0, 39.8, 20.1, 12.5. LRMS (EI, 70 eV)  $m/z$  (%): 242 (100), 213 (77), 227 (62), 214 (44), 195 (24). HRMS (ESI) for  $C_{14}H_{15}N_2S$   $[M+H]^+$ : calcd 243.0950, found 243.0962. IR (ATR,  $cm^{-1}$ ): 3748, 3642, 1659, 1546, 1407, 1109, 802.

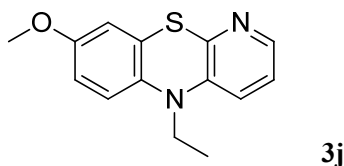

**5-ethyl-8-methoxy-5H-benzo[b]pyrido[3,2-e][1,4]thiazine (3j):**

Yield: 22 mg (42%). Brown oil.  $^1H$  NMR (500 MHz,  $CDCl_3$ )  $\delta$  7.98 (dd,  $J = 4.9, 1.6$  Hz, 1H), 7.20 (dd,  $J = 7.4, 1.7$  Hz, 1H), 6.80 (d,  $J = 8.9$  Hz, 1H), 6.71 – 6.66 (m, 2H), 6.63 (d,  $J = 2.9$  Hz, 1H), 4.09 (q,  $J = 6.9$  Hz, 2H), 3.75 (s, 3H), 1.37 (t,  $J = 7.0$  Hz, 3H).  $^{13}C$  NMR (125 MHz,  $CDCl_3$ )  $\delta$  155.5, 155.0, 145.0, 136.1, 134.0, 122.3, 117.1, 116.3, 115.8, 112.7, 112.6, 55.7, 39.9, 12.6. LRMS (EI, 70 eV)  $m/z$  (%): 258 (100), 229 (73), 243 (46), 186 (23), 215 (22). HRMS (ESI) for  $C_{14}H_{15}ON_2S$   $[M+H]^+$ : calcd 259.0900, found 259.0891. IR (ATR,  $cm^{-1}$ ): 3669, 2914, 2372, 1659, 1523, 1490, 1212, 837.

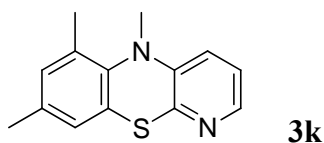

**5,6,8-trimethyl-5H-benzo[b]pyrido[3,2-e][1,4]thiazine (3k):**

Yield: 26 mg (54%). Brown oil.  $^1H$  NMR (500 MHz,  $CDCl_3$ )  $\delta$  8.06 (dd,  $J = 4.9, 1.5$  Hz, 1H), 7.28 (dd,  $J = 7.5, 1.5$  Hz, 1H), 6.82 (s, 1H), 6.78 (s, 1H), 6.75 (dd,  $J = 7.5, 5.0$  Hz, 1H), 3.58 (s, 3H), 2.35 (s, 3H), 2.22 (s, 3H).  $^{13}C$  NMR (125 MHz,  $CDCl_3$ )  $\delta$  159.0, 145.2, 140.1, 133.8, 133.5, 132.4, 128.8, 127.9, 125.3, 120.6, 117.7, 40.0, 20.9, 20.2. LRMS (EI, 70 eV)  $m/z$  (%): 242 (100), 227 (87), 241 (30), 209 (24), 243 (17). HRMS (ESI) for  $C_{14}H_{15}N_2S$   $[M+H]^+$ : calcd 243.0950, found 243.0959. IR (ATR,  $cm^{-1}$ ): 3561, 2346, 1570, 1449, 1399, 1126, 846, 772.

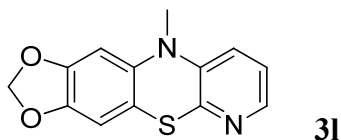

**3l**

**10-methyl-10H-[1,3]dioxolo[4',5':4,5]benzo[1,2-b]pyrido[3,2-e][1,4]thiazine (3l):** Yield: 35 mg (67%). Brown solid, mp 111.8–113.1 °C. <sup>1</sup>H NMR (500 MHz, CDCl<sub>3</sub>) δ 8.04 (d, *J* = 4.9 Hz, 1H), 7.29 (d, *J* = 7.4 Hz, 1H), 6.77 (dd, *J* = 7.3, 5.0 Hz, 1H), 6.60 (s, 1H), 6.51 (s, 1H), 5.92 (s, 2H), 3.40 (s, 3H). <sup>13</sup>C NMR (125 MHz, CDCl<sub>3</sub>) δ 156.1, 148.0, 145.2, 143.5, 139.5, 134.1, 117.8, 117.5, 111.6, 107.2, 101.6, 97.8, 34.0. LRMS (EI, 70eV) *m/z* (%): 258 (100), 243 (37), 200 (25), 225 (20), 226 (19). HRMS (ESI) for C<sub>13</sub>H<sub>11</sub>O<sub>2</sub>N<sub>2</sub>S [M+H]<sup>+</sup>: calcd 259.0536, found 259.0543. IR (ATR, cm<sup>-1</sup>): 3040, 2848, 1494, 1434, 1401, 1309, 846, 761.

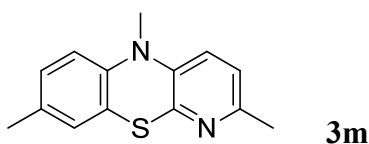

**3m**

**2,5,8-trimethyl-5H-benzo[b]pyrido[3,2-e][1,4]thiazine (3m):** Yield: 29 mg (60%). Grey oil. <sup>1</sup>H NMR (500 MHz, CDCl<sub>3</sub>) δ 7.14 (d, *J* = 7.5 Hz, 1H), 6.93 (d, *J* = 8.2 Hz, 1H), 6.89 (s, 1H), 6.72 (d, *J* = 8.2 Hz, 1H), 6.58 (t, *J* = 10.9 Hz, 1H), 3.42 (s, 3H), 2.39 (s, 3H), 2.22 (s, 3H). <sup>13</sup>C NMR (125 MHz, CDCl<sub>3</sub>) δ 154.9, 154.3, 142.0, 134.3, 132.2, 128.0, 127.3, 121.1, 116.6, 114.5, 113.1, 33.2, 23.9, 20.2. LRMS (EI, 70 eV) *m/z* (%): 242 (100), 227 (43), 241 (42), 209 (38), 243 (17). HRMS (ESI) for C<sub>14</sub>H<sub>15</sub>N<sub>2</sub>S [M+H]<sup>+</sup>: calcd 243.0950, found 243.0954. IR (ATR, cm<sup>-1</sup>): 3649, 2961, 2372, 1500, 1434, 1142, 804, 658.

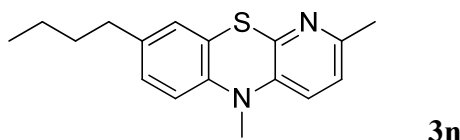

**3n**

**8-butyl-2,5-dimethyl-5H-benzo[b]pyrido[3,2-e][1,4]thiazine (3n):** Yield: 29 mg (51%). Yellow oil. <sup>1</sup>H NMR (500 MHz, CDCl<sub>3</sub>) δ 7.14 (d, *J* = 7.5 Hz, 1H), 6.94 (d, *J* = 8.3 Hz, 1H), 6.89 (s, 1H), 6.74 (d, *J* = 8.2 Hz, 1H), 6.59 (d, *J* = 7.5 Hz, 1H), 3.42 (s, 3H), 2.49 (t, *J* = 7.7 Hz, 2H), 2.38 (s, 3H), 1.54 (m, 2H), 1.32 (m, 2H), 0.91 (t, *J* = 7.0 Hz, 3H). <sup>13</sup>C NMR (125 MHz, CDCl<sub>3</sub>) δ 155.0, 154.3, 142.2, 137.4, 134.3, 127.4, 126.6, 121.0, 116.6, 114.5, 113.1, 34.5, 33.5, 33.2, 23.9, 22.2, 13.9. LRMS (EI, 70 eV) *m/z* (%) 241 (100), 284 (95), 285 (19), 242 (18), 209 (15). HRMS (ESI) for C<sub>17</sub>H<sub>21</sub>N<sub>2</sub>S [M+H]<sup>+</sup>: calcd 285.1420, found 285.1422. IR (ATR, cm<sup>-1</sup>): 3662, 2914, 2345, 1639, 1546, 1377, 1142, 812.

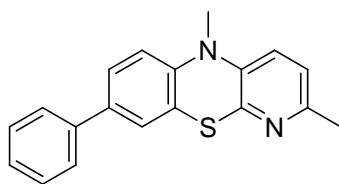

**3o**

**2,5-dimethyl-8-phenyl-5H-benzo[b]pyrido[3,2-e][1,4]thiazine (3o):**

Yield: 33 mg (55%). Yellow solid, mp 97.5–98.8 °C. <sup>1</sup>H NMR (500 MHz, CDCl<sub>3</sub>) δ 7.44 (d, *J* = 7.8 Hz, 2H), 7.35 – 7.29 (m, 3H), 7.23 (t, *J* = 5.4 Hz, 2H), 7.10 (d, *J* = 7.5 Hz, 1H), 6.81 (d, *J* = 8.4 Hz, 1H), 6.56 (d, *J* = 7.5 Hz, 1H), 3.40 (s, 3H), 2.33 (s, 3H). <sup>13</sup>C NMR (125 MHz, CDCl<sub>3</sub>) δ 154.5, 154.5, 143.7, 139.9, 135.8, 134.4, 128.8 (s, 2C), 127.1, 126.5 (s, 2C), 126.1, 125.2, 121.7, 116.9, 114.8, 112.9, 33.3, 23.9. LRMS (EI, 70 eV) *m/z* (%): 304 (100), 303 (36), 289 (28), 305 (23), 271 (14). HRMS (ESI) for C<sub>19</sub>H<sub>17</sub>N<sub>2</sub>S [M+H]<sup>+</sup>: calcd 305.1107, found 305.1115. IR (ATR, cm<sup>-1</sup>): 3642, 2956, 1507, 1437, 1377, 1145, 816, 758.

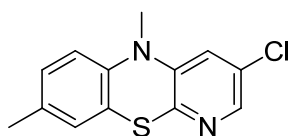

**3p**

**3-chloro-5,8-dimethyl-5H-benzo[b]pyrido[3,2-e][1,4]thiazine (3p):**

Yield: 32 mg (61%). Yellow solid, mp 117.7–119.4 °C. <sup>1</sup>H NMR (500 MHz, CDCl<sub>3</sub>) δ 7.93 (d, *J* = 1.9 Hz, 1H), 7.22 (d, *J* = 2.0 Hz, 1H), 6.96 (d, *J* = 8.1 Hz, 1H), 6.87 (s, 1H), 6.73 (d, *J* = 8.2 Hz, 1H), 3.39 (s, 3H), 2.24 (s, 3H). <sup>13</sup>C NMR (125 MHz, CDCl<sub>3</sub>) δ 153.9, 143.0, 141.2, 133.3, 132.9, 128.5, 127.4, 124.6, 119.8, 118.8, 114.7, 33.4, 20.2. LRMS (EI, 70 eV) *m/z* (%): 262 (100), 247 (61), 264 (39), 229 (25), 249 (22). HRMS (ESI) for C<sub>13</sub>H<sub>12</sub>ClN<sub>2</sub>S [M+H]<sup>+</sup>: calcd 263.0404, found 263.0414. IR (ATR, cm<sup>-1</sup>): 2974, 2908, 2338, 1646, 1430, 1245, 888, 789.

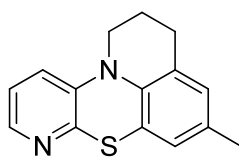

**3q**

**5-methyl-2,3-dihydro-1H-pyrido[3',2':5,6][1,4]thiazino[2,3,4-ij]quinoline (3q):**

Yield: 30 mg (59%). Yellow oil, <sup>1</sup>H NMR (500 MHz, CDCl<sub>3</sub>) δ 7.98 (d, *J* = 4.9 Hz, 1H), 7.21 (d, *J* = 7.4 Hz, 1H), 6.72 – 6.66 (m, 3H), 3.92 (t, *J* = 6.0 Hz, 2H), 2.70 (t, *J* = 6.1 Hz, 2H), 2.18 (s, 3H), 2.04 (m, 2H). <sup>13</sup>C NMR (125 MHz, CDCl<sub>3</sub>) δ 154.7, 144.9, 137.3, 133.7, 132.0, 128.9, 125.7, 125.3, 118.6, 117.3, 116.3, 44.7, 28.0, 21.6, 20.1. LRMS (EI, 70 eV) *m/z* (%): 254 (100), 253 (23), 255 (18), 224 (18), 221 (17). HRMS (ESI) for C<sub>15</sub>H<sub>15</sub>N<sub>2</sub>S [M+H]<sup>+</sup>: calcd 255.0950, found 255.0954. IR (ATR, cm<sup>-1</sup>): 3053, 2941, 1570, 1411, 1125, 847, 789, 718.



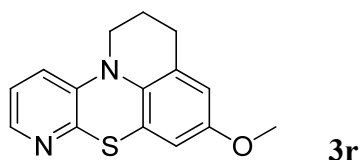

**5-methoxy-2,3-dihydro-1H-pyrido[3',2':5,6][1,4]thiazino[2,3,4-ij]quinoline (3r):**

Yield: 24 mg (45%). Black oil.  $^1\text{H}$  NMR (500 MHz,  $\text{CDCl}_3$ )  $\delta$  7.99 (d,  $J = 4.8$  Hz, 1H), 7.22 (d,  $J = 7.4$  Hz, 1H), 6.70 (dd,  $J = 7.3, 5.0$  Hz, 1H), 6.49 (d,  $J = 2.7$  Hz, 1H), 6.45 (d,  $J = 2.6$  Hz, 1H), 3.93 (t,  $J = 6.0$  Hz, 2H), 3.72 (s, 3H), 2.72 (t,  $J = 6.2$  Hz, 2H), 2.04 (m, 2H).  $^{13}\text{C}$  NMR (125 MHz,  $\text{CDCl}_3$ )  $\delta$  155.2, 154.9, 145.0, 133.8, 133.4, 126.8, 120.1, 117.1, 115.8, 113.5, 110.6, 55.6, 44.5, 28.3, 21.6. LRMS (EI, 70 eV)  $m/z$  (%): 270 (100), 255 (56), 271 (16), 227 (14), 199 (11). HRMS (ESI) for  $\text{C}_{15}\text{H}_{15}\text{N}_2\text{OS}$   $[\text{M}+\text{H}]^+$ : calcd 271.0900, found 271.0900. IR (ATR,  $\text{cm}^{-1}$ ): 3656, 2346, 1573, 1546, 1407, 1139, 1043, 758.

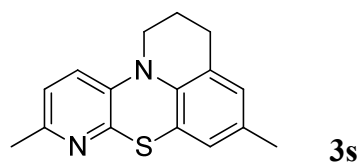

**5,9-dimethyl-2,3-dihydro-1H-pyrido[3',2':5,6][1,4]thiazino[2,3,4-ij]quinoline (3s):**

Yield: 31mg (58%). Grey oil.  $^1\text{H}$  NMR (500 MHz,  $\text{CDCl}_3$ )  $\delta$  7.00 (d,  $J = 7.5$  Hz, 1H), 6.60 (d,  $J = 5.1$  Hz, 1H), 6.58 (s, 1H), 6.48 (d,  $J = 7.5$  Hz, 1H), 3.86 (t,  $J = 6.0$  Hz, 2H), 2.60 (t,  $J = 6.1$  Hz, 2H), 2.27 (s, 3H), 2.09 (s, 3H), 1.94 (m, 2H).  $^{13}\text{C}$  NMR (125 MHz,  $\text{CDCl}_3$ )  $\delta$  153.1, 153.0, 136.6, 132.9, 130.6, 127.7, 124.5, 124.2, 117.9, 115.3, 111.0, 43.4, 27.1, 22.9, 20.7, 19.1. LRMS (EI, 70 eV)  $m/z$  (%): 268 (100), 235 (24), 267 (23), 269 (19), 253 (15). HRMS (ESI) for  $\text{C}_{16}\text{H}_{17}\text{N}_2\text{S}$   $[\text{M}+\text{H}]^+$ : calcd 269.1107, found 269.1105. IR (ATR,  $\text{cm}^{-1}$ ): 3649, 2936, 1865, 1719, 1503, 1185, 849, 663.

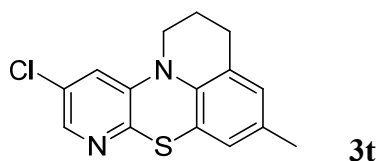

**10-chloro-5-methyl-2,3-dihydro-1H-pyrido[3',2':5,6][1,4]thiazino[2,3,4-ij]quinoline (3t):**

Yield: 37 mg (64%). Yellow solid, mp 138.6–140.2 °C.  $^1\text{H}$  NMR (500 MHz,  $\text{CDCl}_3$ )  $\delta$  7.88 (dd,  $J = 2.2, 0.9$  Hz, 1H), 7.16 (t,  $J = 2.1$  Hz, 1H), 6.67 (d,  $J = 10.6$  Hz, 2H), 3.85 (t,  $J = 6.0$ , 2H), 2.68 (t,  $J = 6.1$  Hz, 2H), 2.18 (s, 3H), 2.02 (m, 2H).  $^{13}\text{C}$  NMR (125 MHz,  $\text{CDCl}_3$ )  $\delta$  153.0, 142.8, 136.8, 132.9, 132.3, 129.1, 125.8, 125.4, 124.2, 117.8, 117.7, 44.9, 27.9, 21.5, 20.1. LRMS (EI, 70 eV)  $m/z$  (%): 288 (100), 290 (36), 289 (24), 287 (18), 258 (17). HRMS (ESI) for  $\text{C}_{15}\text{H}_{14}\text{ClN}_2\text{S}$   $[\text{M}+\text{H}]^+$ : calcd 289.0561, found 289.0569. IR (ATR,  $\text{cm}^{-1}$ ): 3642, 3556, 1716, 1500, 1420, 1102, 849, 746.

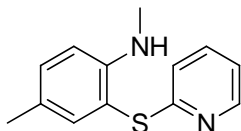

Intermediate **B**

**N,4-dimethyl-2-(pyridin-2-ylthio)aniline (B):**

Yield: 110 mg (48%). Yellow solid, mp 70.6–72.3 °C. <sup>1</sup>H NMR (500 MHz, CDCl<sub>3</sub>) δ 8.41 (d, *J* = 4.2 Hz, 1H), 7.47 – 7.35 (m, 1H), 7.33 (d, *J* = 1.0 Hz, 1H), 7.19 (d, *J* = 8.3 Hz, 1H), 6.96 (dd, *J* = 7.3, 5.0 Hz, 1H), 6.69 (d, *J* = 8.1 Hz, 1H), 6.62 (d, *J* = 8.3 Hz, 1H), 4.79 (brs, 1H), 2.80 (s, 3H), 2.25 (s, 3H). <sup>13</sup>C NMR (125 MHz, CDCl<sub>3</sub>) δ 161.0, 149.5, 148.7, 138.1, 136.7, 132.7, 126.2, 119.8, 119.6, 112.2, 110.4, 30.7, 20.1. LRMS (EI, 70 eV) *m/z* (%): 197 (100), 230 (25), 182 (17), 200 (16), 198 (15). HRMS (ESI) for C<sub>13</sub>H<sub>15</sub>N<sub>2</sub>S [M+H]<sup>+</sup>: calcd 231.0950, found 231.0953. IR (ATR, cm<sup>-1</sup>): 3642, 2352, 1656, 1513, 1420, 1169, 809, 754.

### 5,8-dimethyl-5H-benzo[b]pyrido[3,2-e][1,4]thiazine (3a)

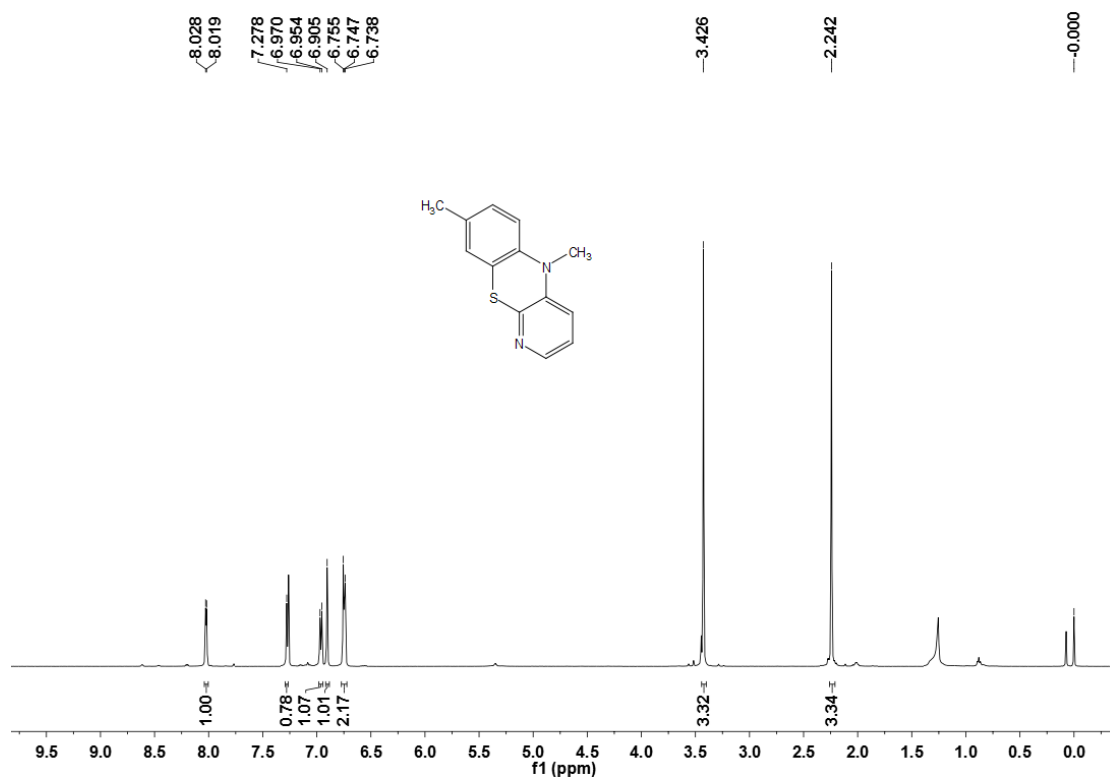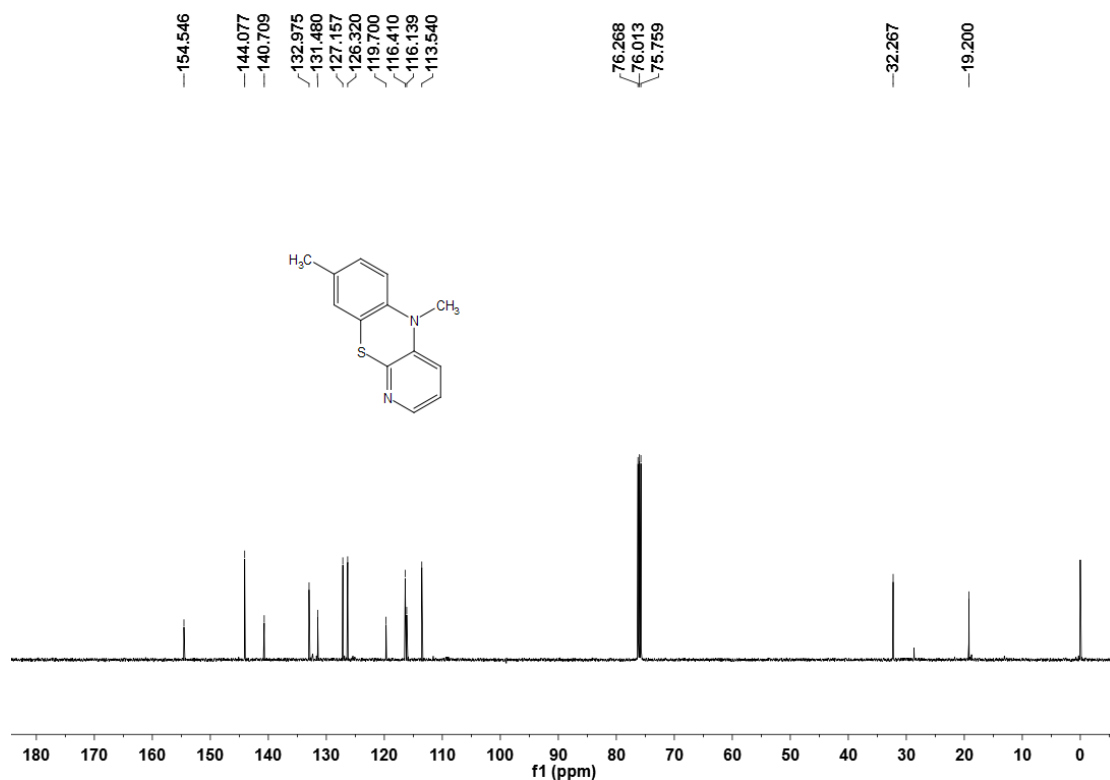

### 8-butyl-5-methyl-5H-benzo[b]pyrido[3,2-e][1,4]thiazine (3b)

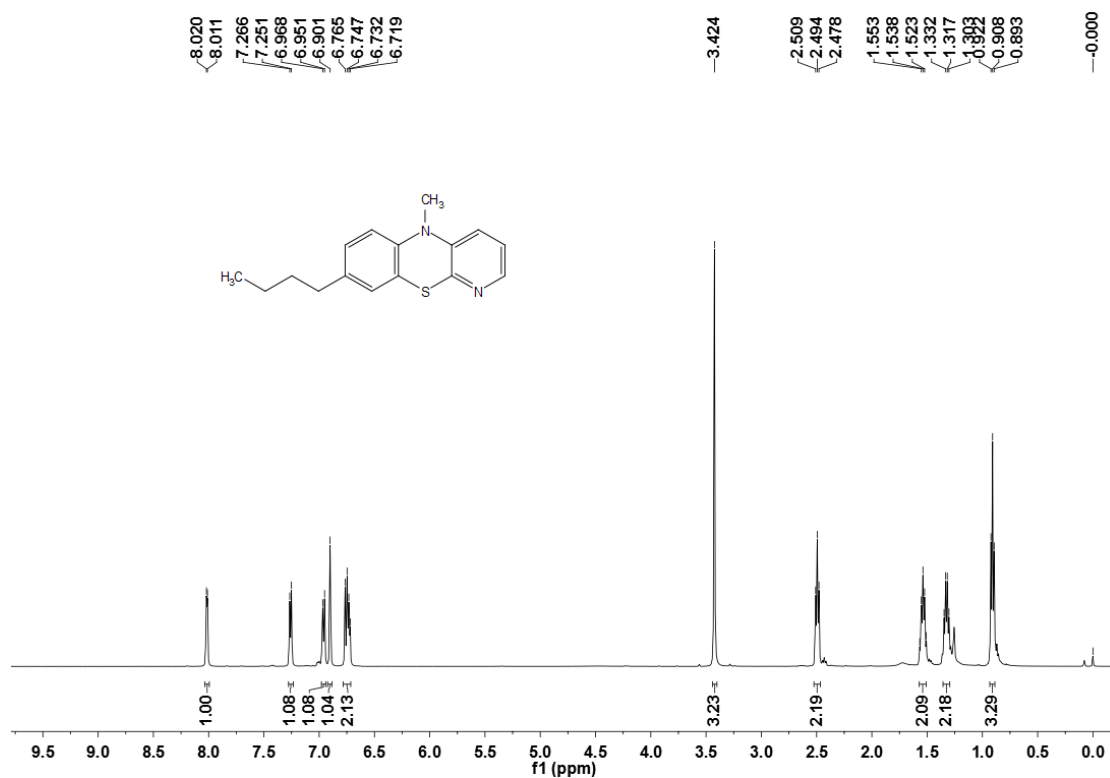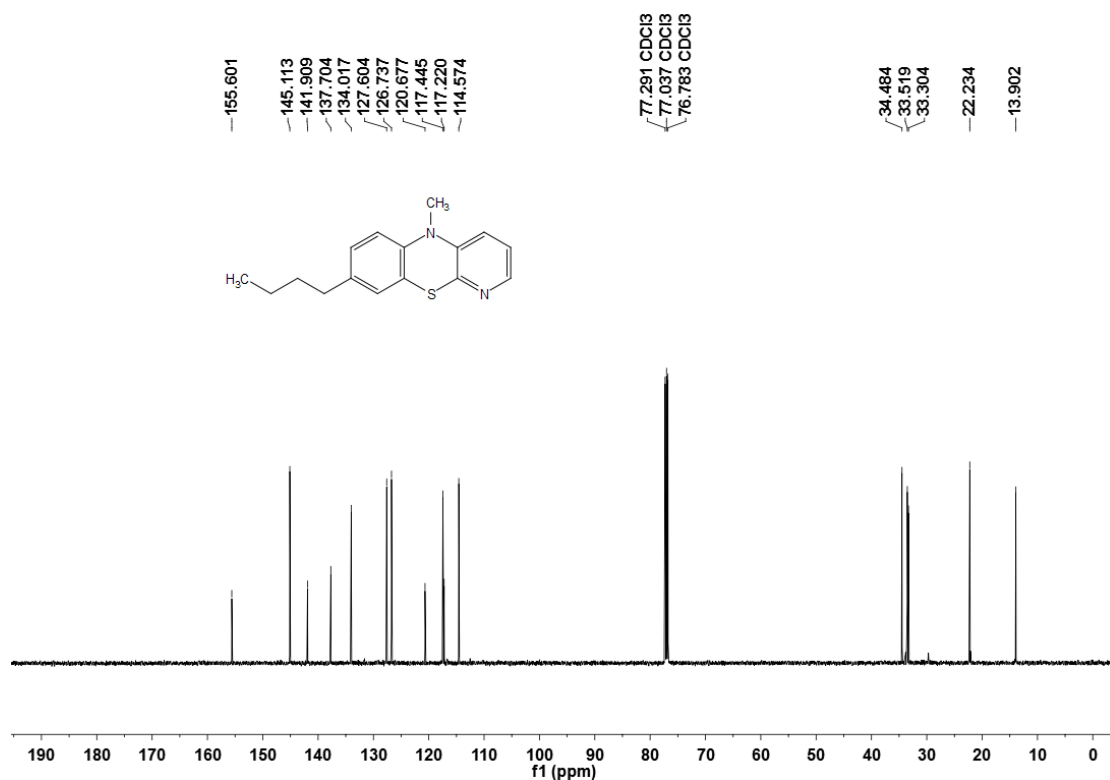

8-methoxy-5-methyl-5H-benzo[b]pyrido[3,2-e][1,4]thiazine (3c)

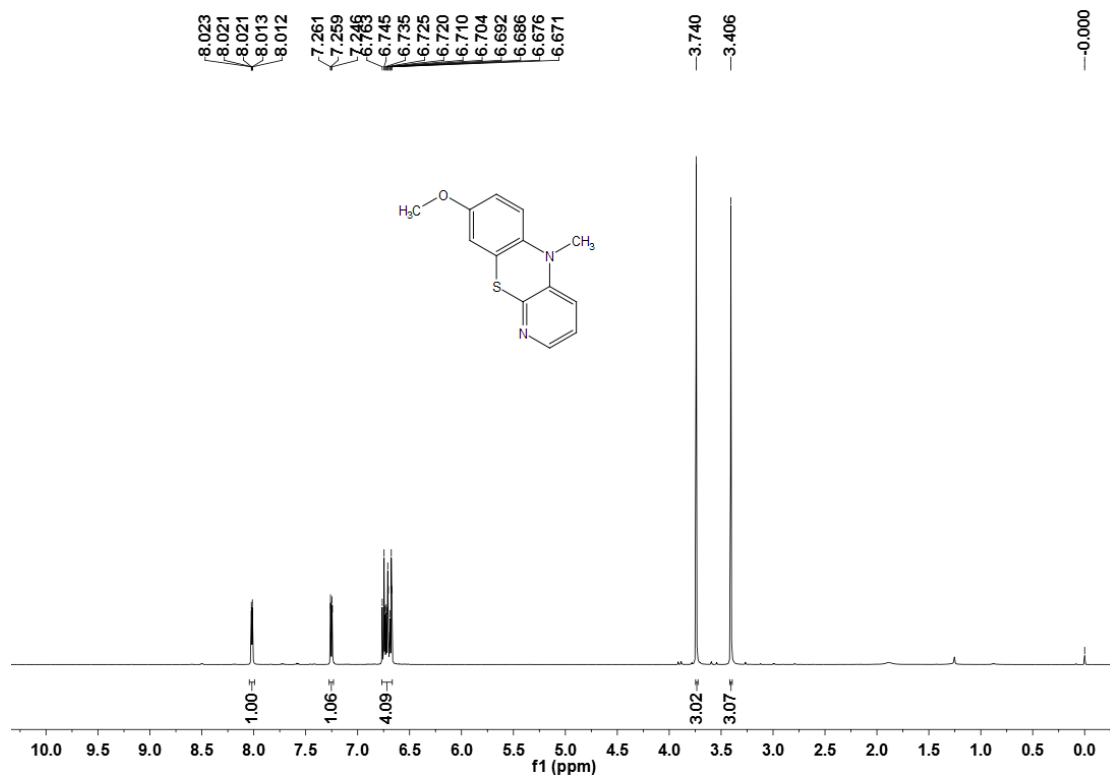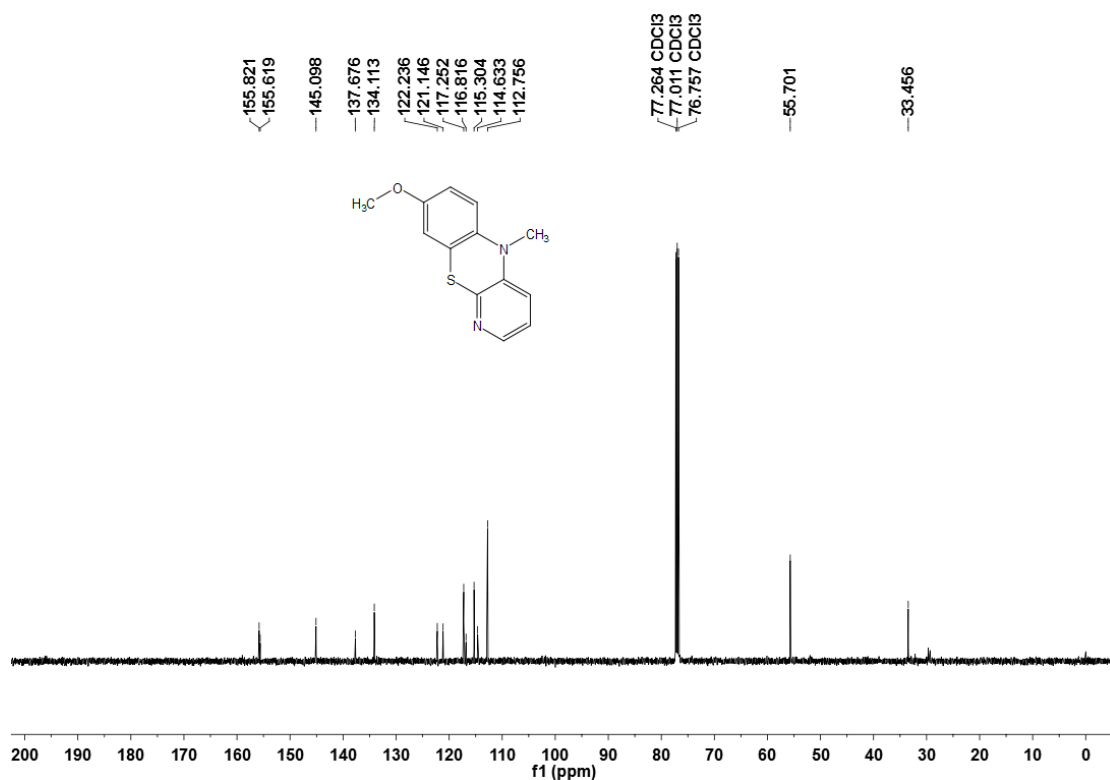

8-fluoro-5-methyl-5H-benzo[b]pyrido[3,2-e][1,4]thiazine (3d)

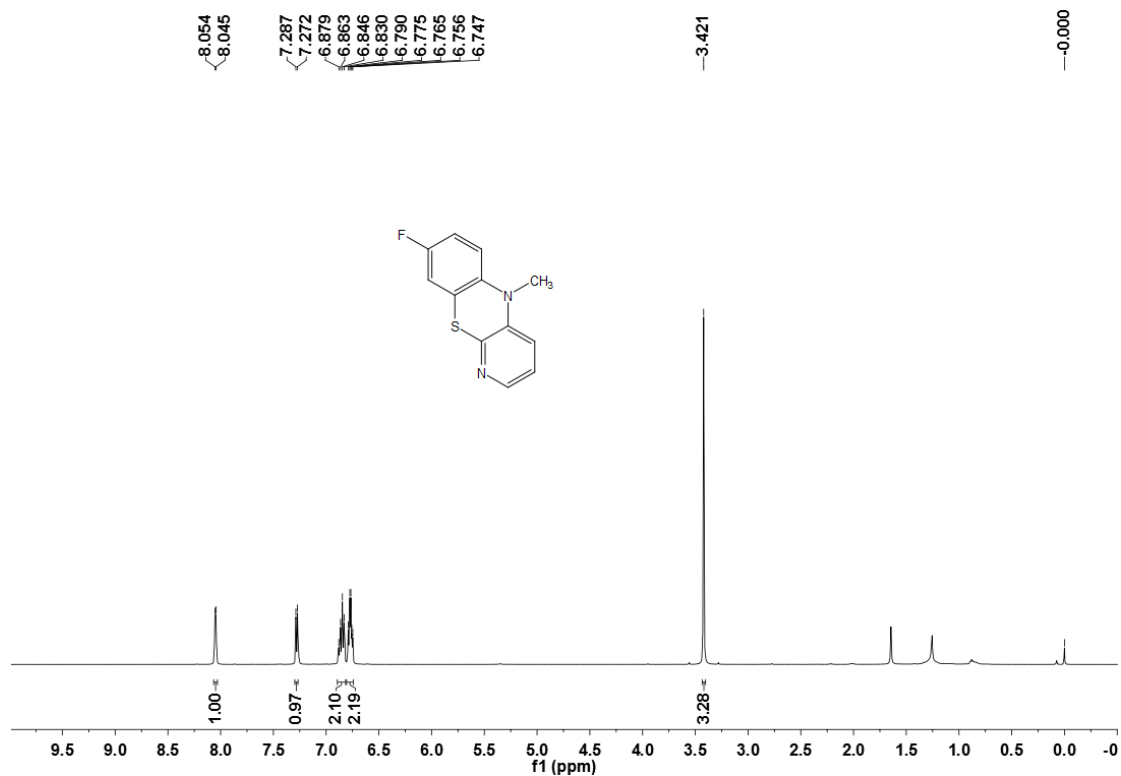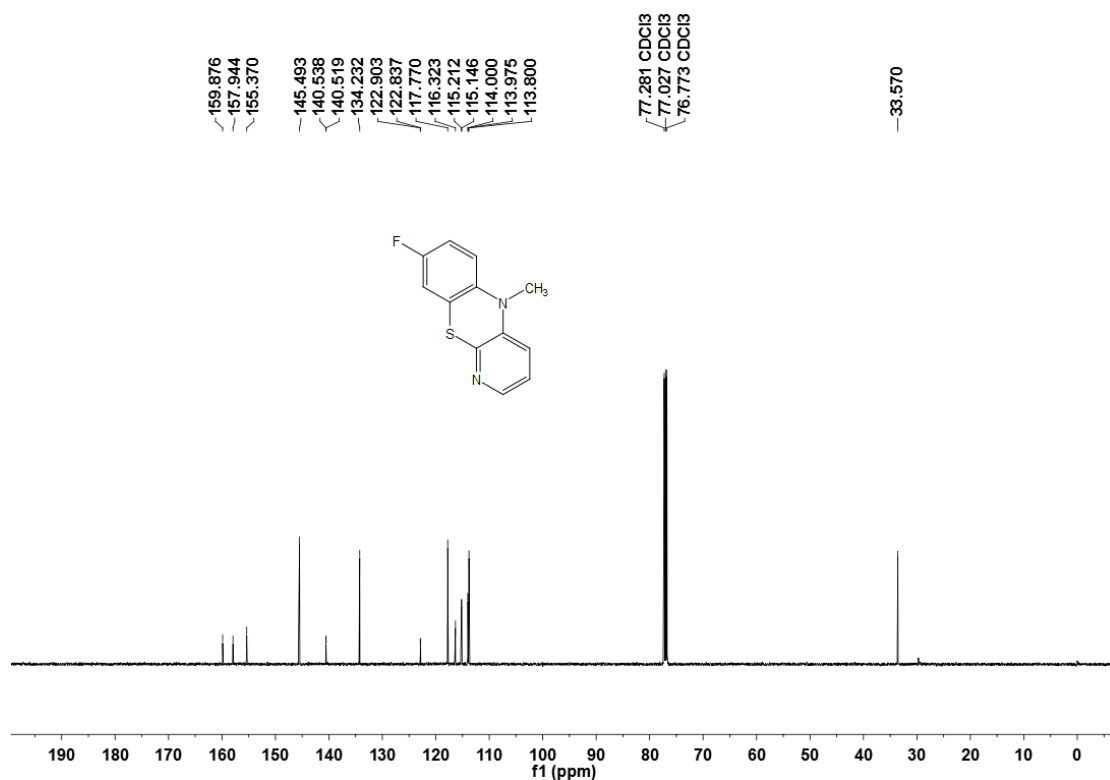

8-chloro-5-methyl-5H-benzo[b]pyrido[3,2-e][1,4]thiazine (3e)

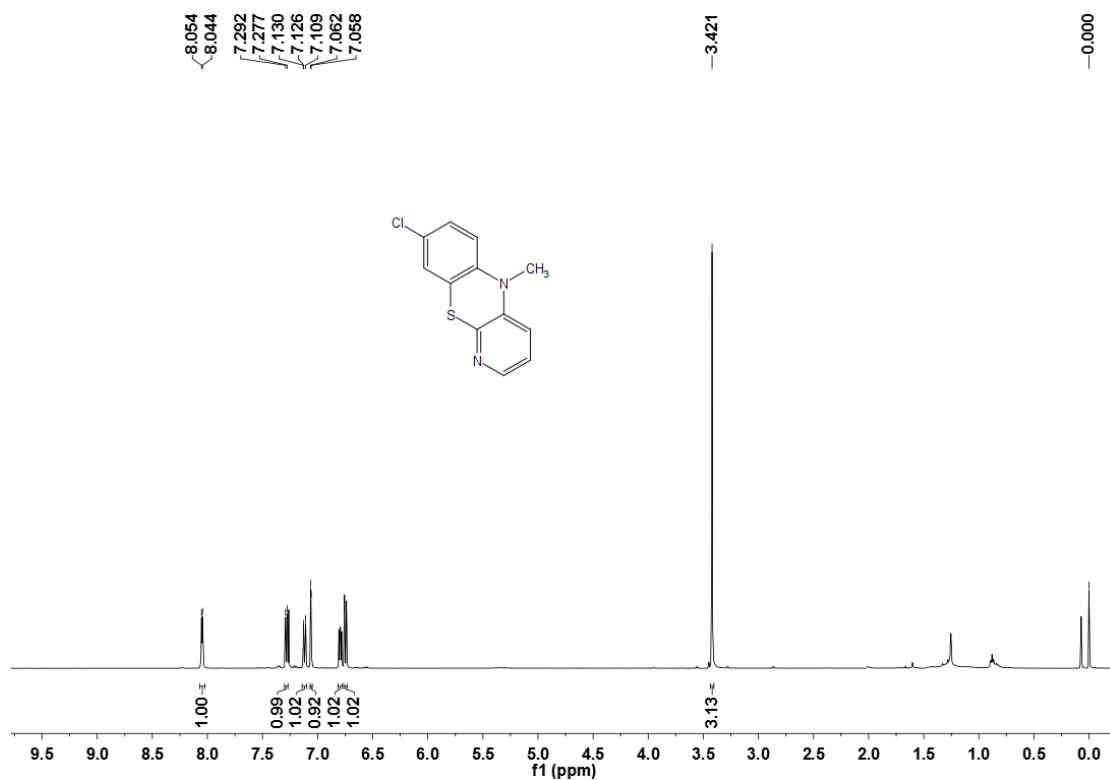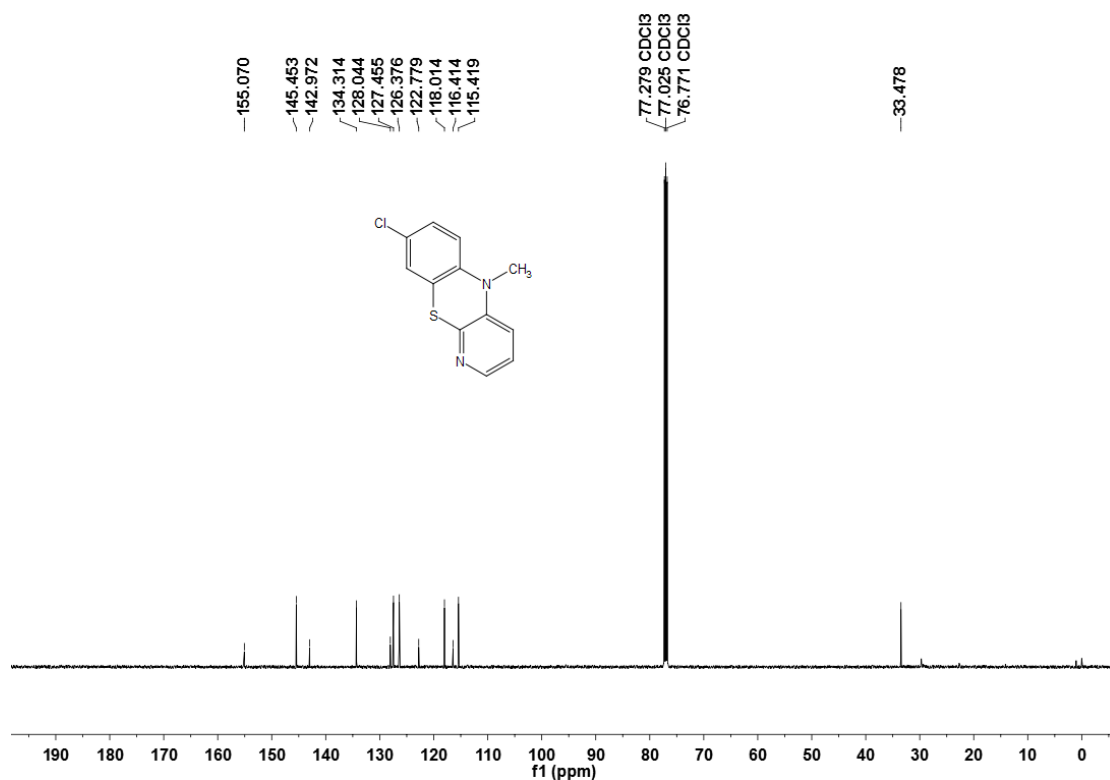

8-bromo-5-methyl-5H-benzo[b]pyrido[3,2-e][1,4]thiazine (3f)

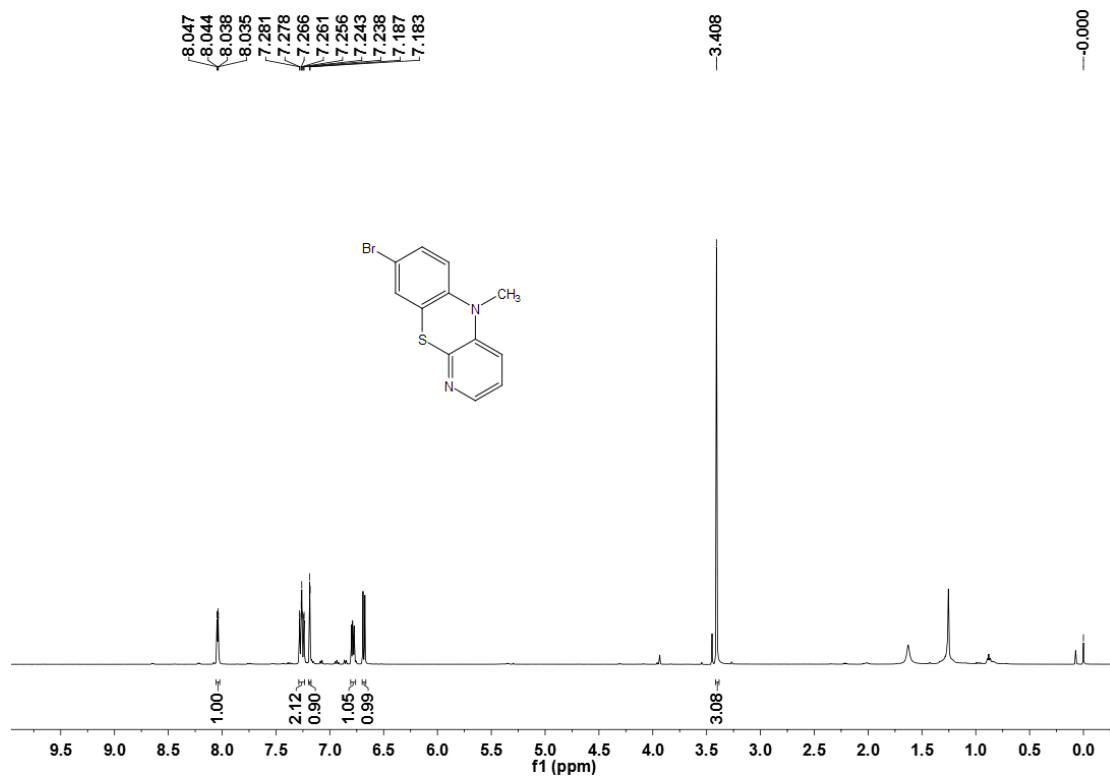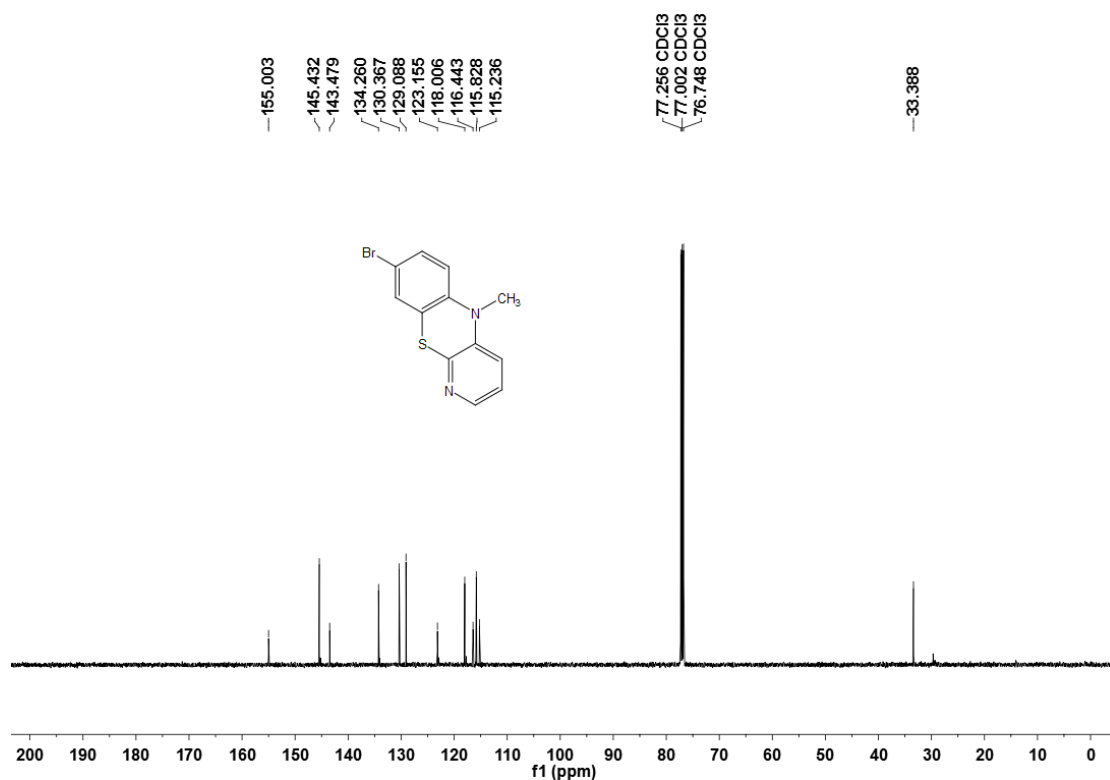



### 5-methyl-8-phenyl-5H-benzo[b]pyrido[3,2-e][1,4]thiazine (3g)

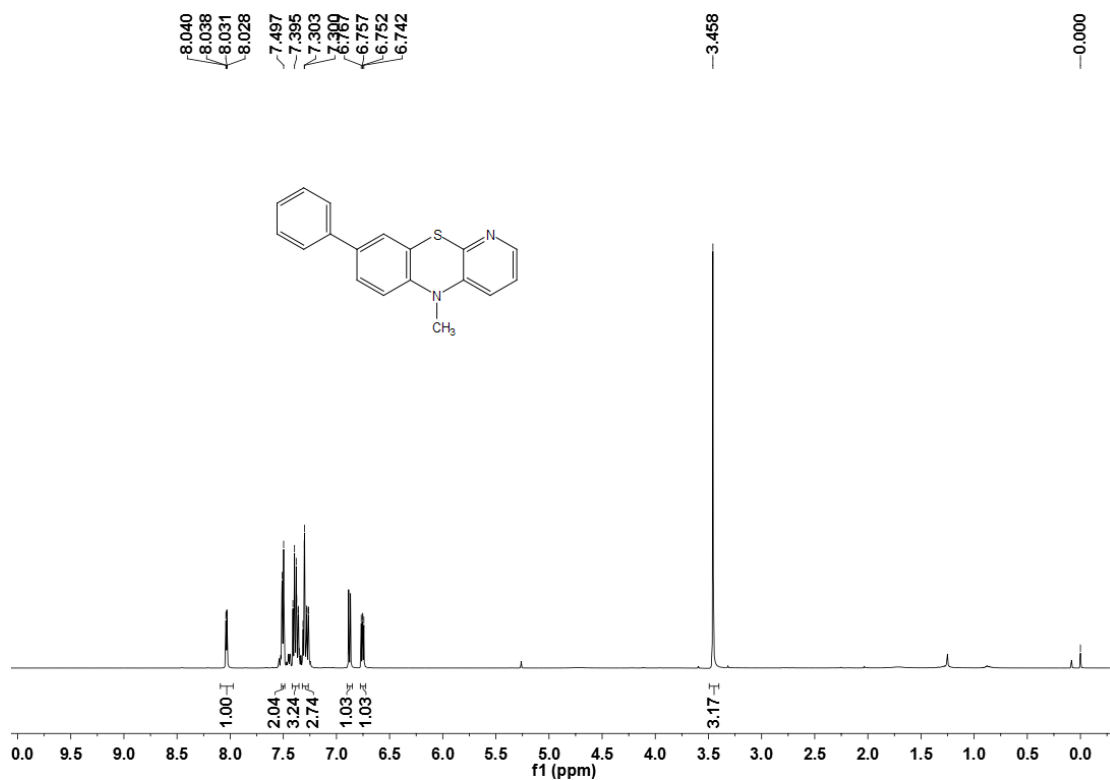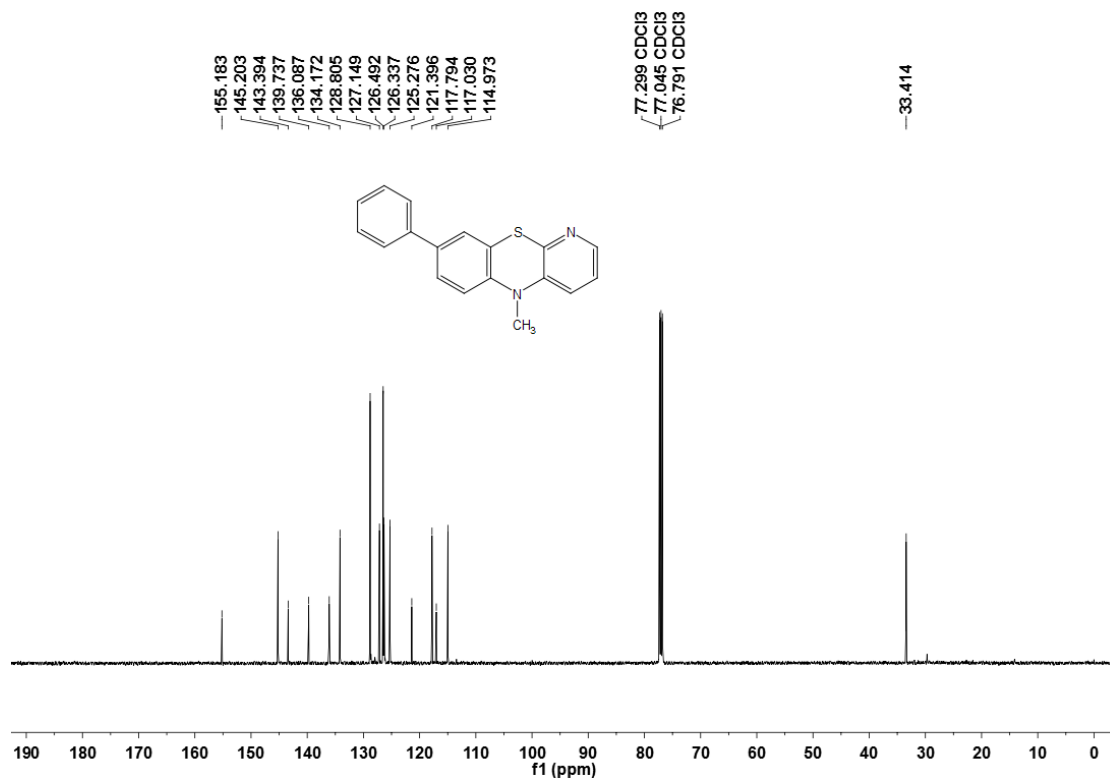

methyl 5-methyl-5H-benzo[b]pyrido[3,2-e][1,4]thiazine-8-carboxylate (3h)

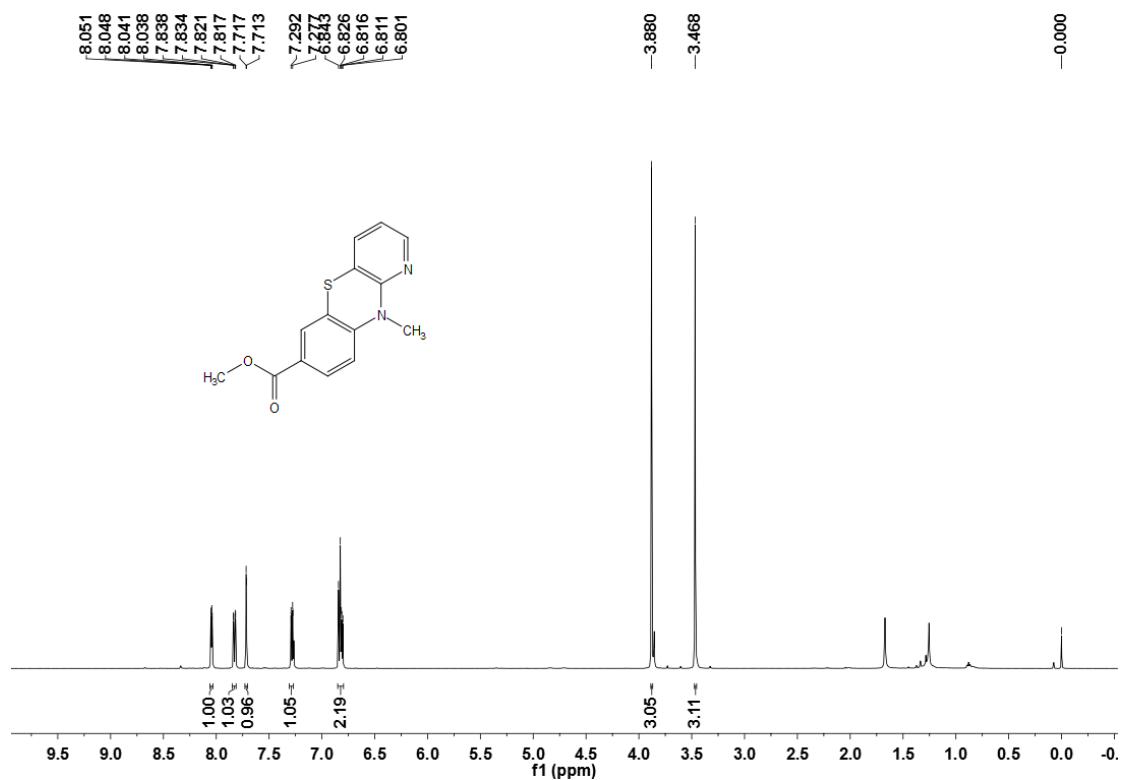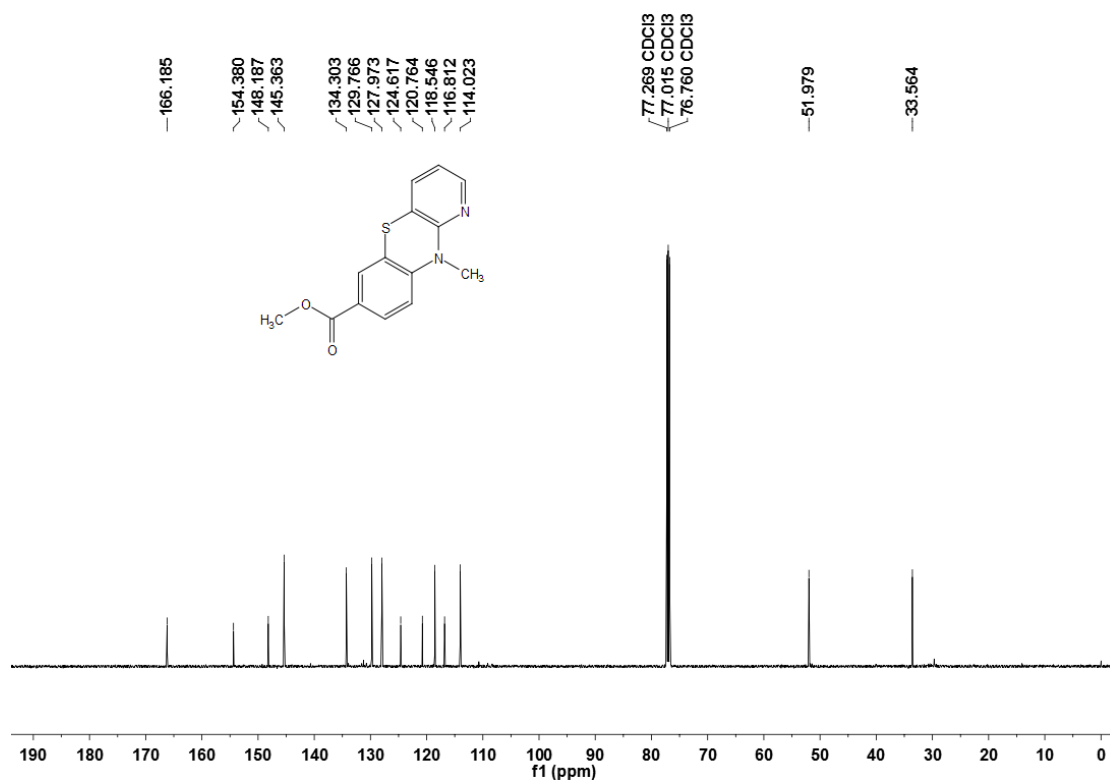

5-ethyl-8-methyl-5H-benzo[b]pyrido[3,2-e][1,4]thiazine (3i)

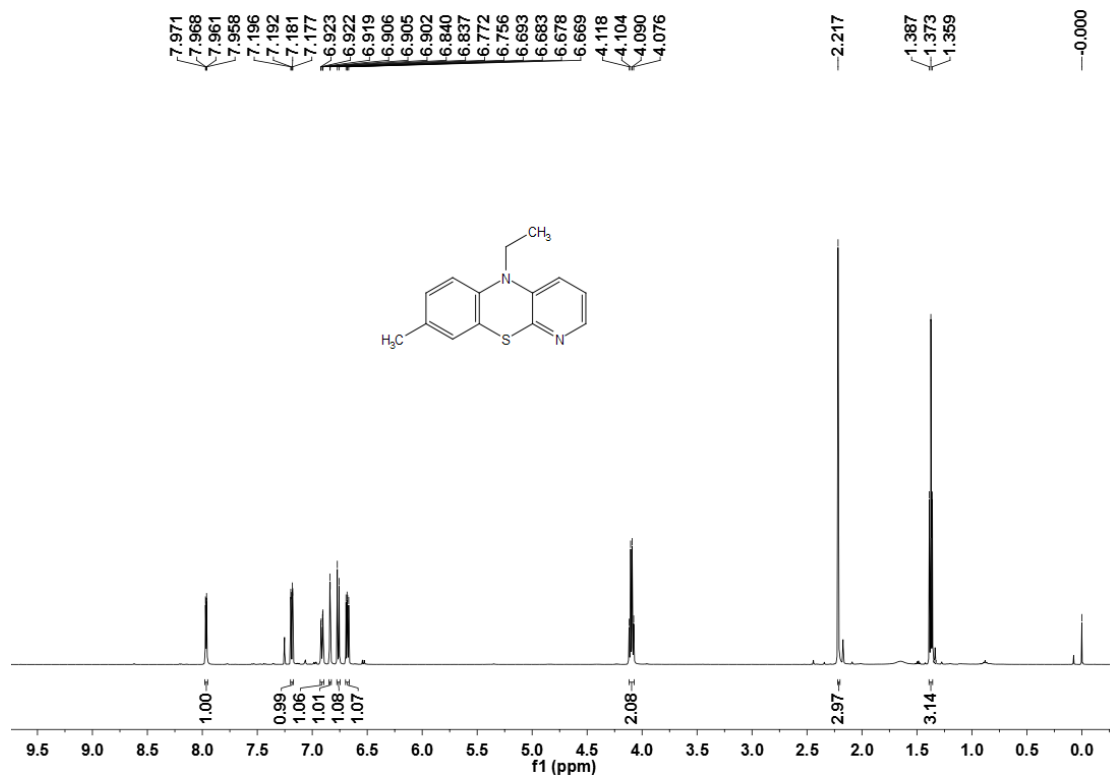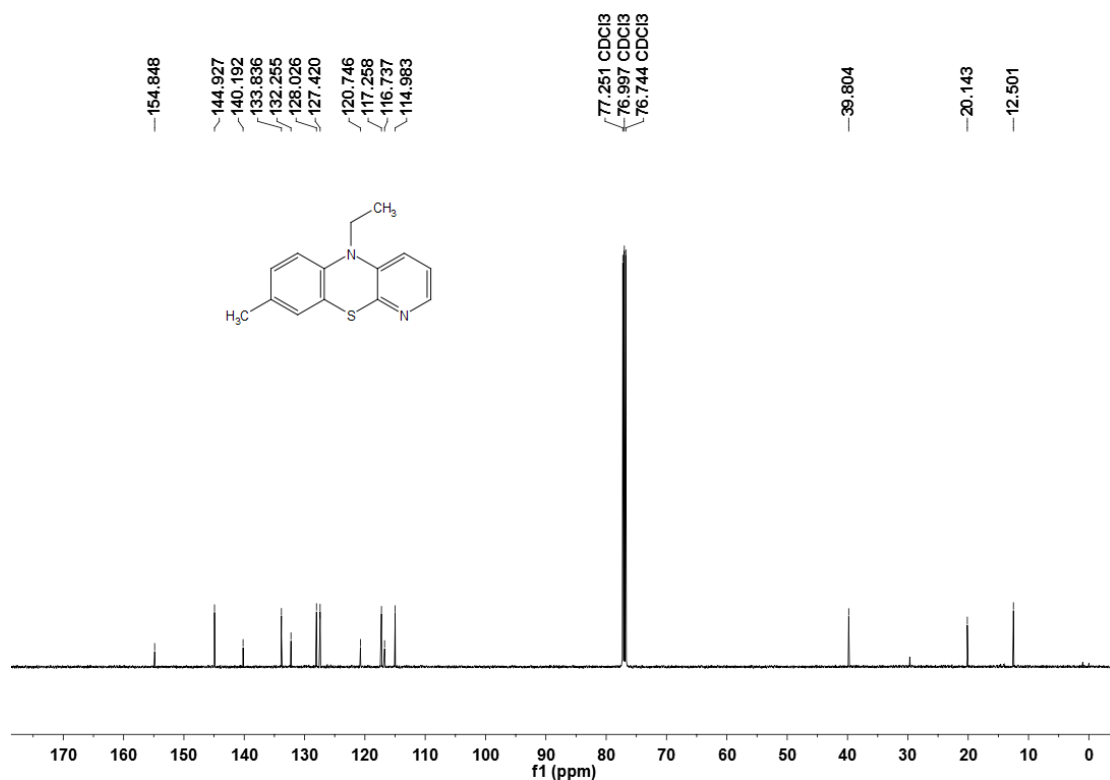

### 5-ethyl-8-methoxy-5H-benzo[b]pyrido[3,2-e][1,4]thiazine (3j)

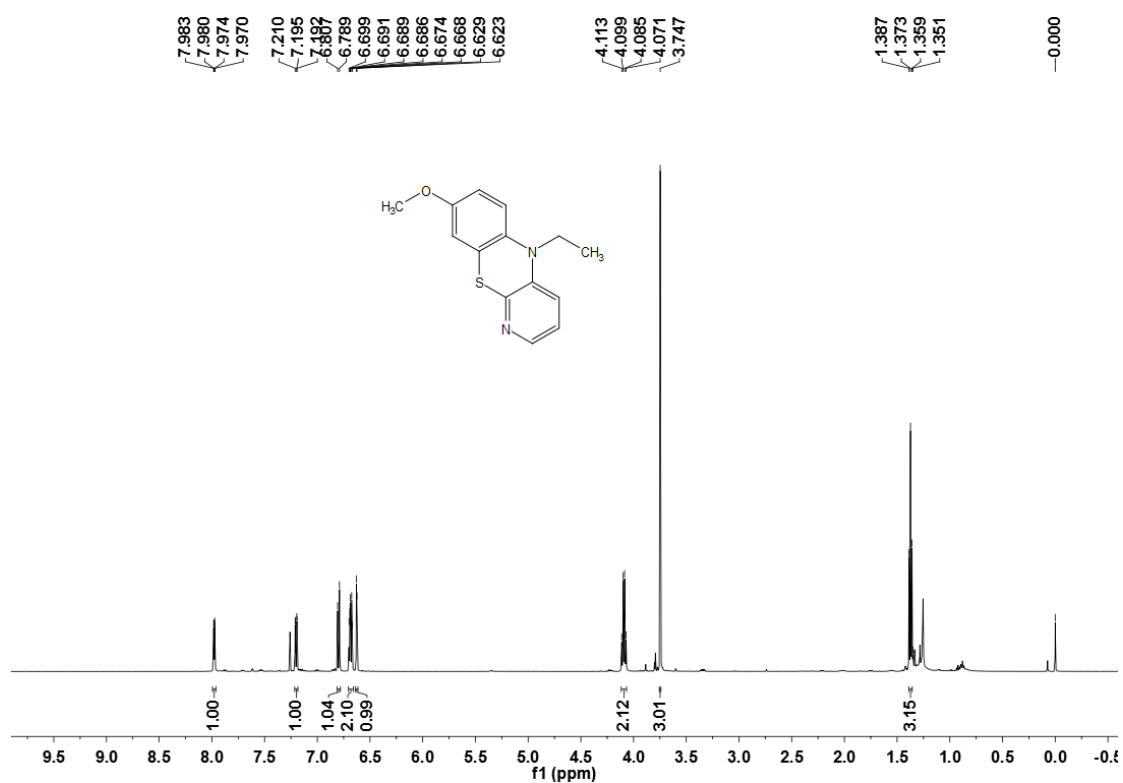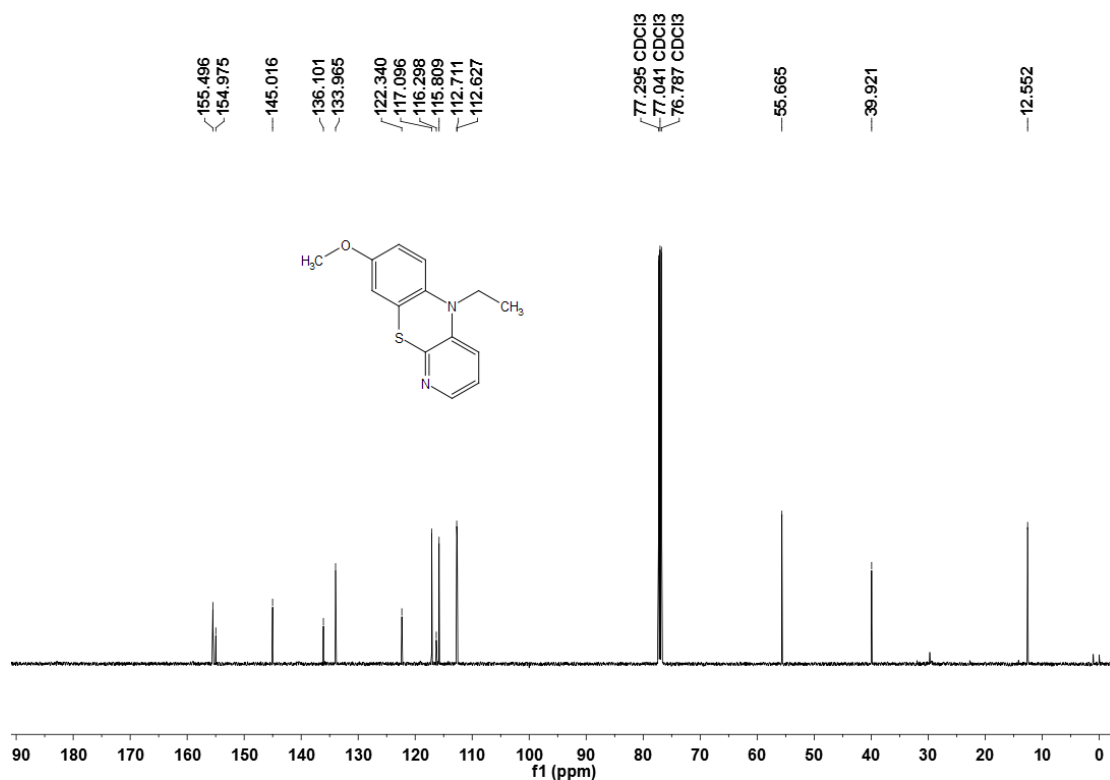

5,6,8-trimethyl-5H-benzo[b]pyrido[3,2-e][1,4]thiazine (3k)

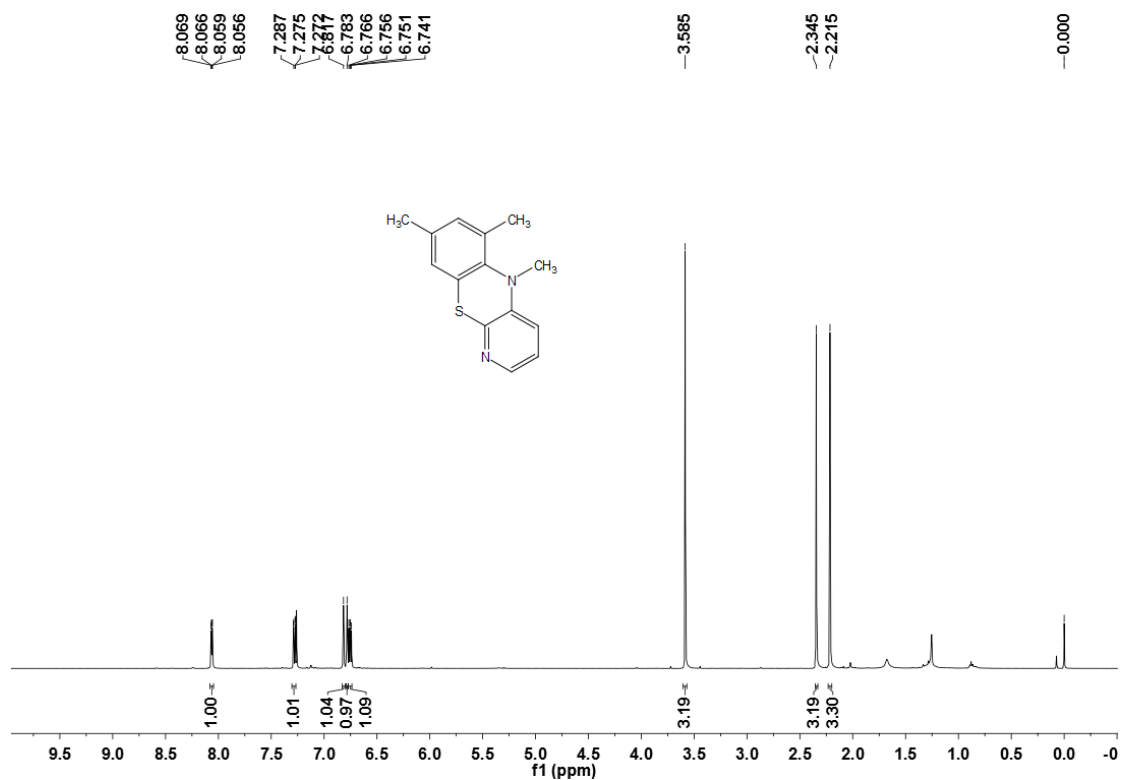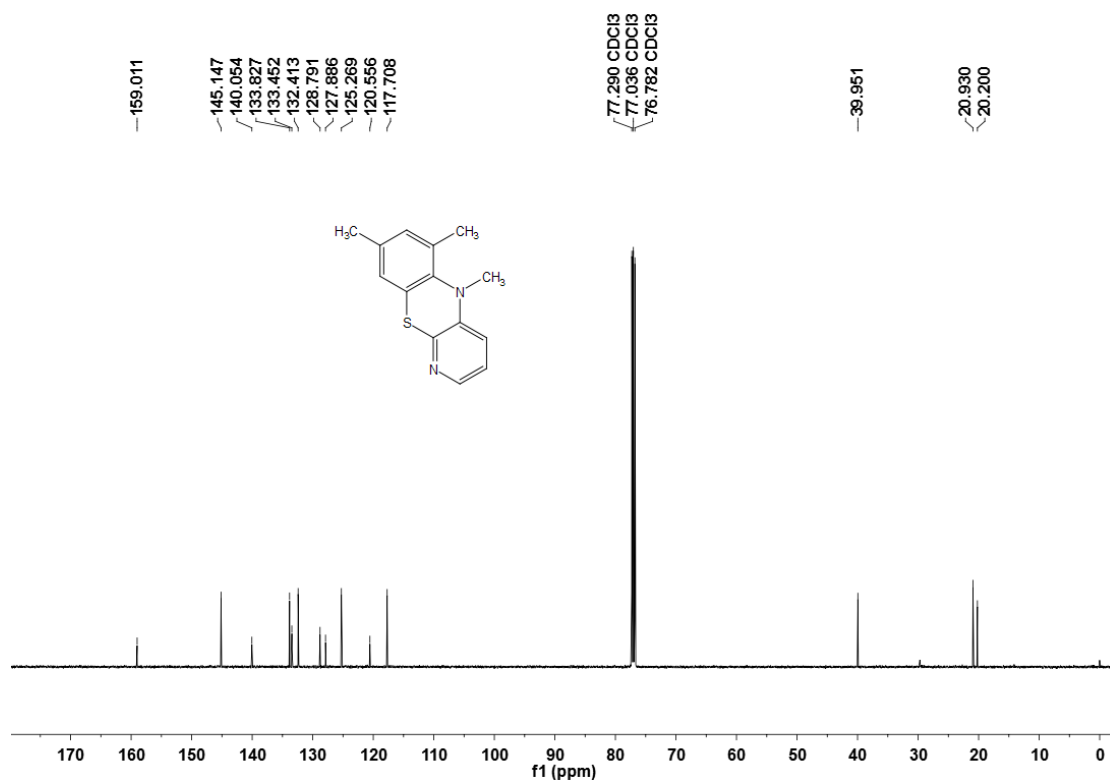

10-methyl-10H-[1,3]dioxolo[4',5':4,5]benzo[1,2-b]pyrido[3,2-e][1,4]thiazine (3l)

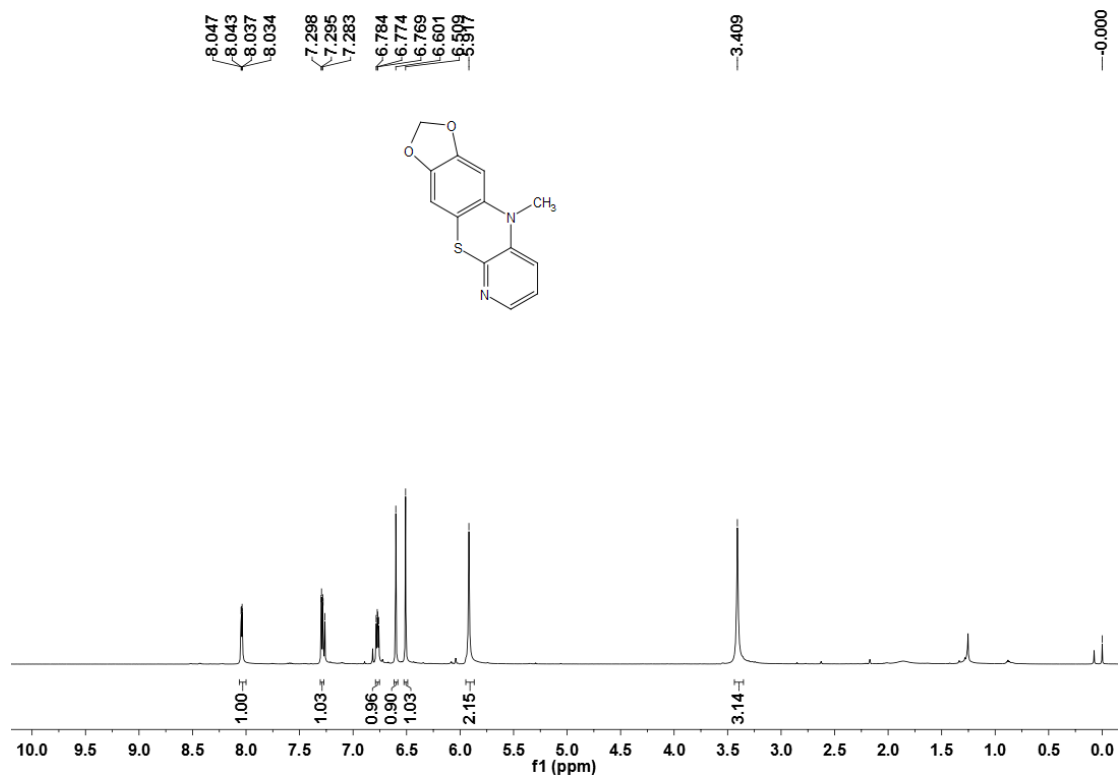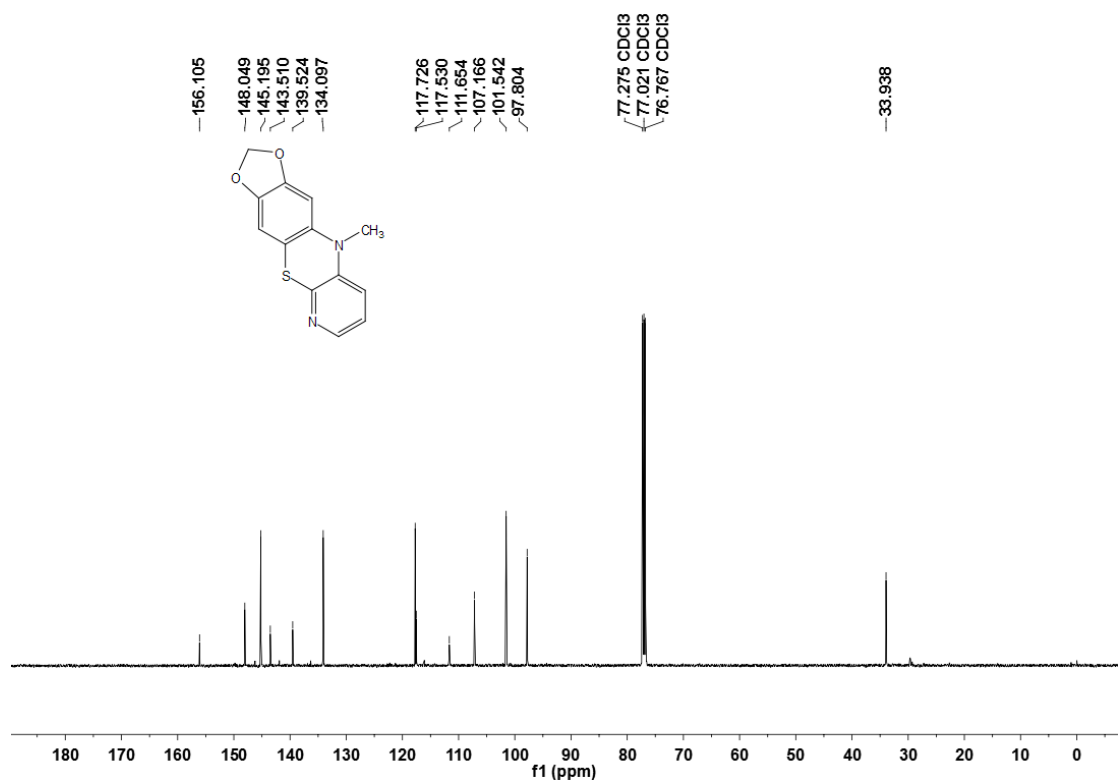

### 2,5,8-trimethyl-5H-benzo[b]pyrido[3,2-e][1,4]thiazine (3m)

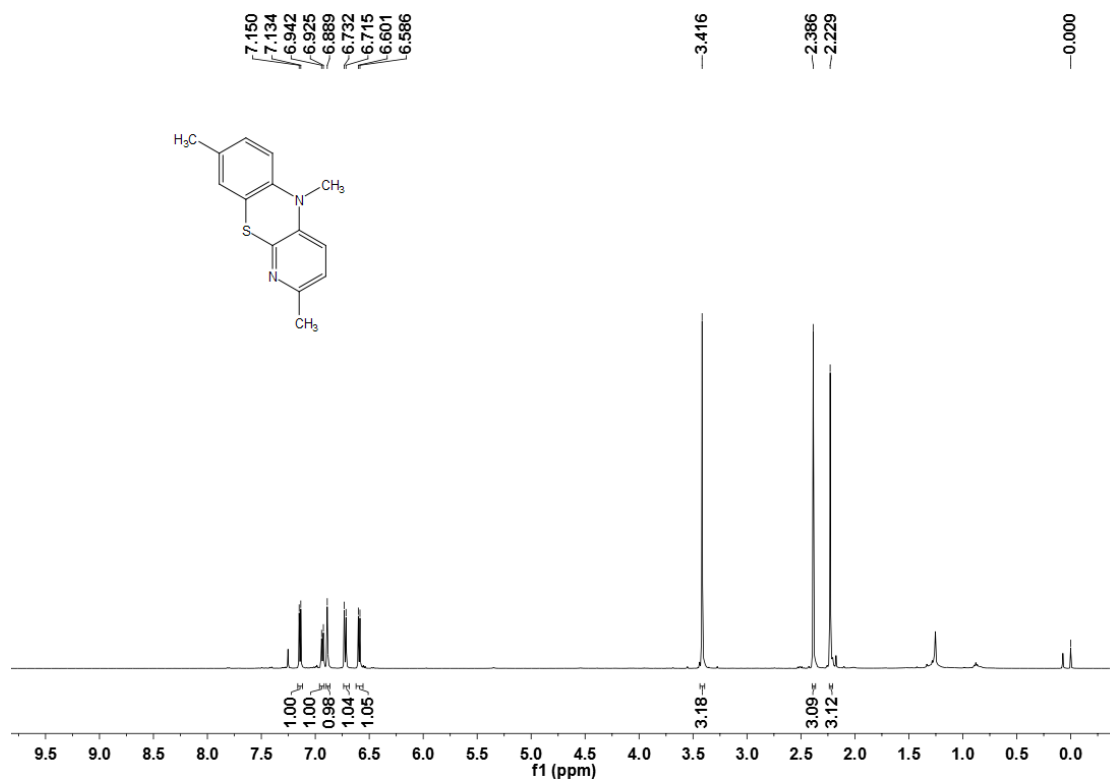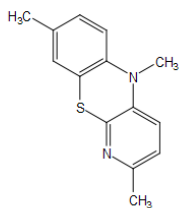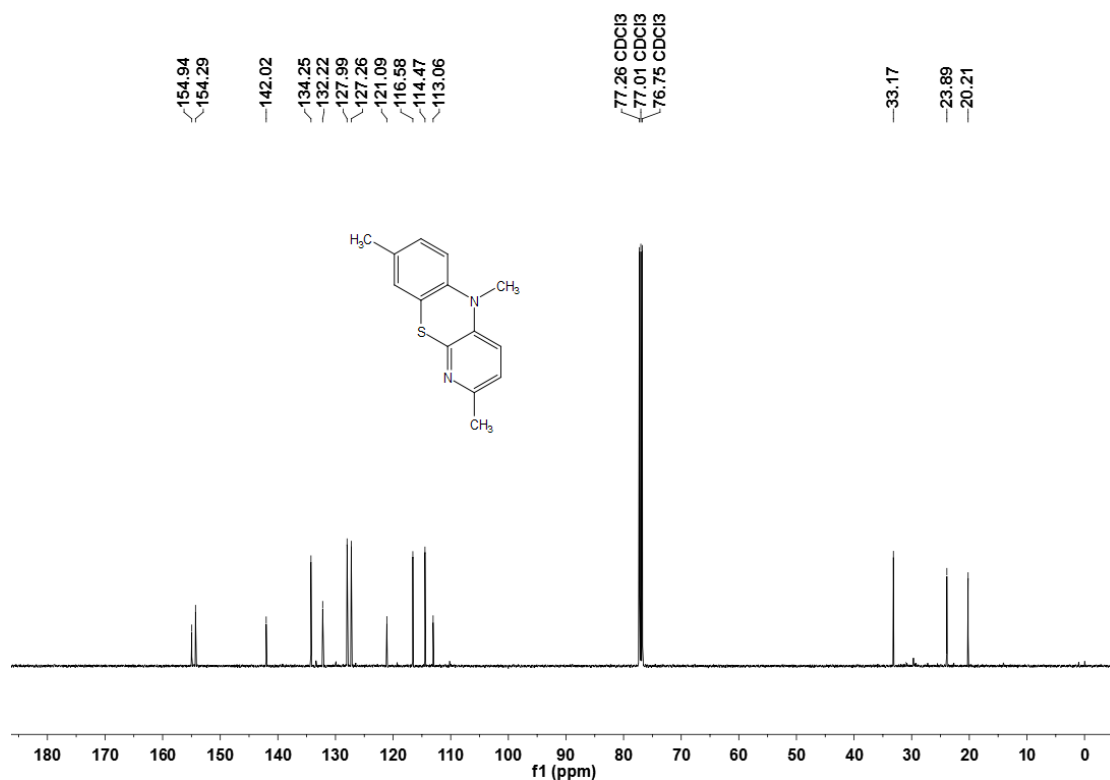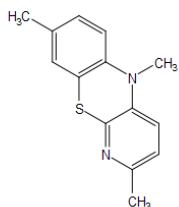

### 8-butyl-2,5-dimethyl-5H-benzo[b]pyrido[3,2-e][1,4]thiazine (3n)

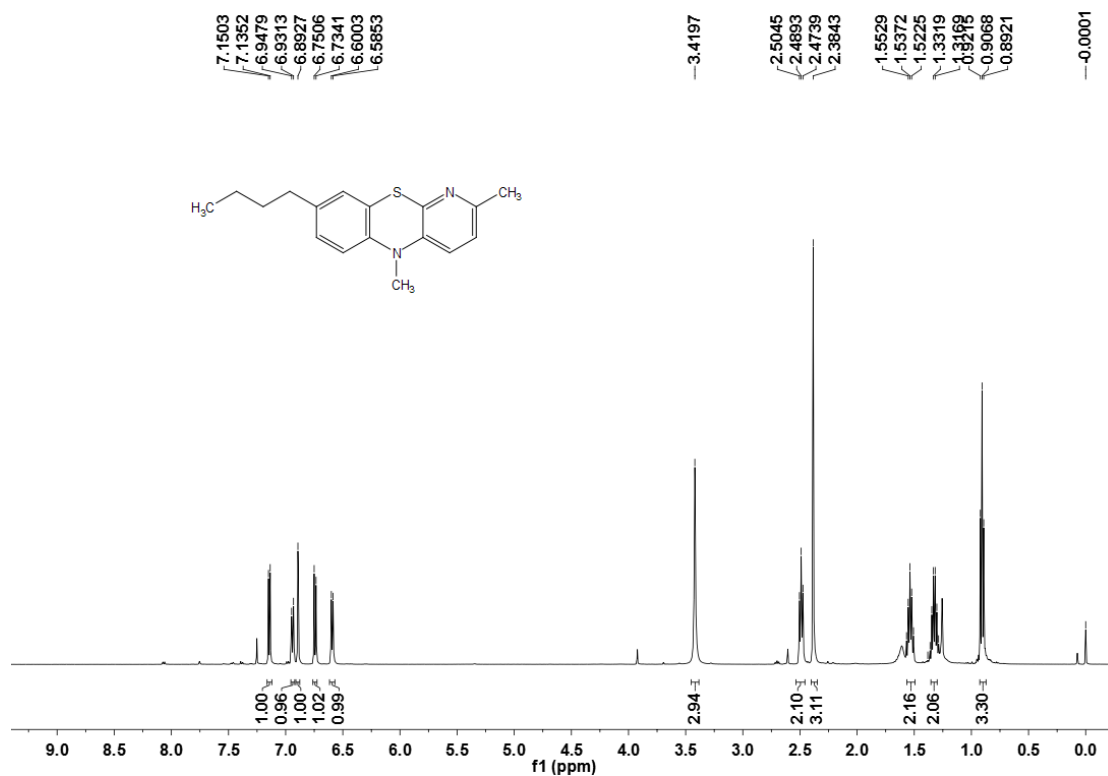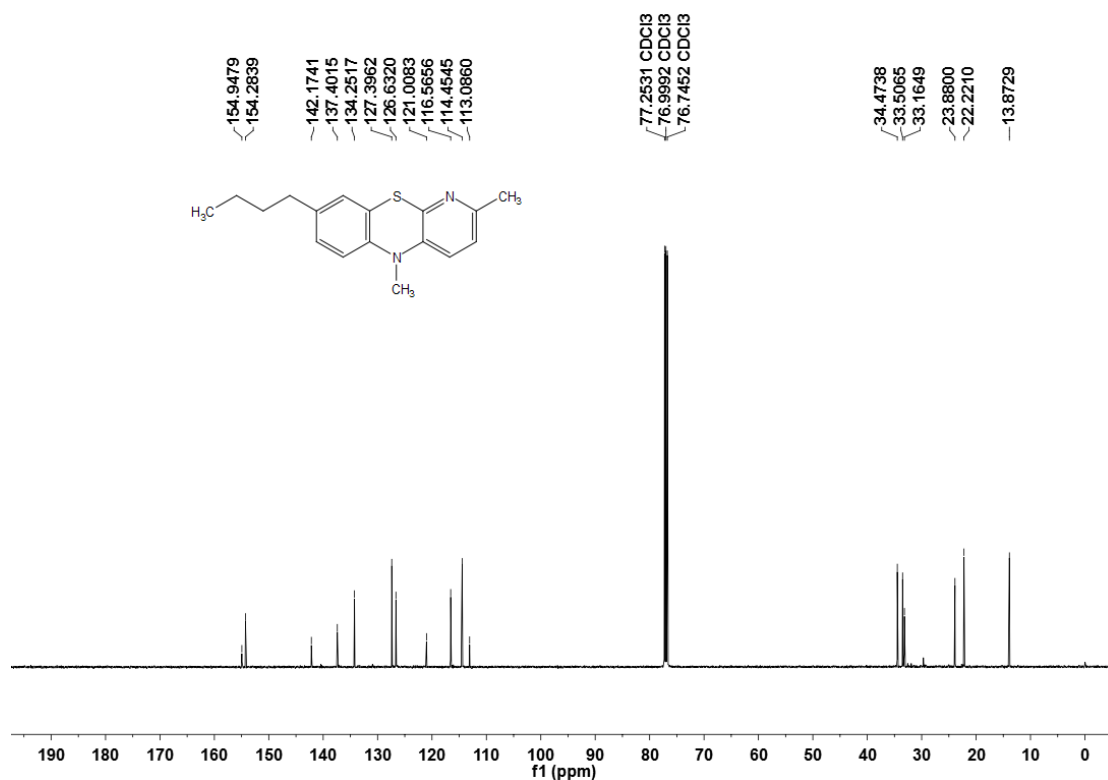



### 2,5-dimethyl-8-phenyl-5H-benzo[b]pyrido[3,2-e][1,4]thiazine (3o)

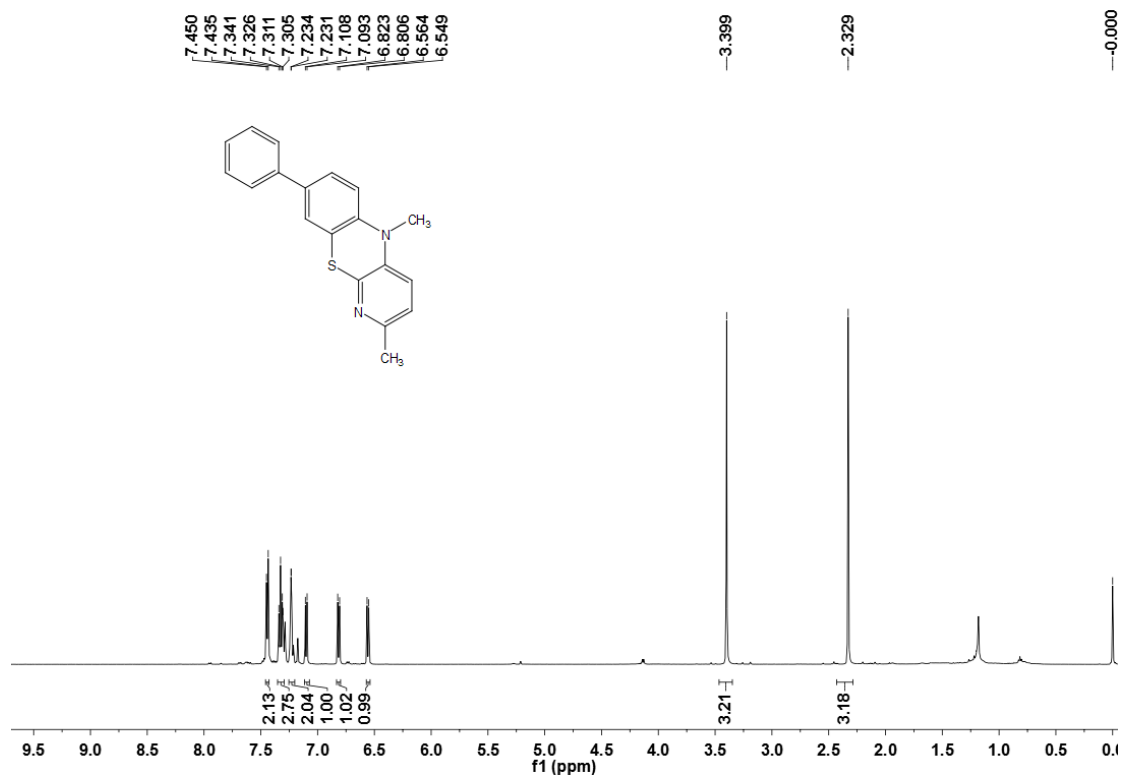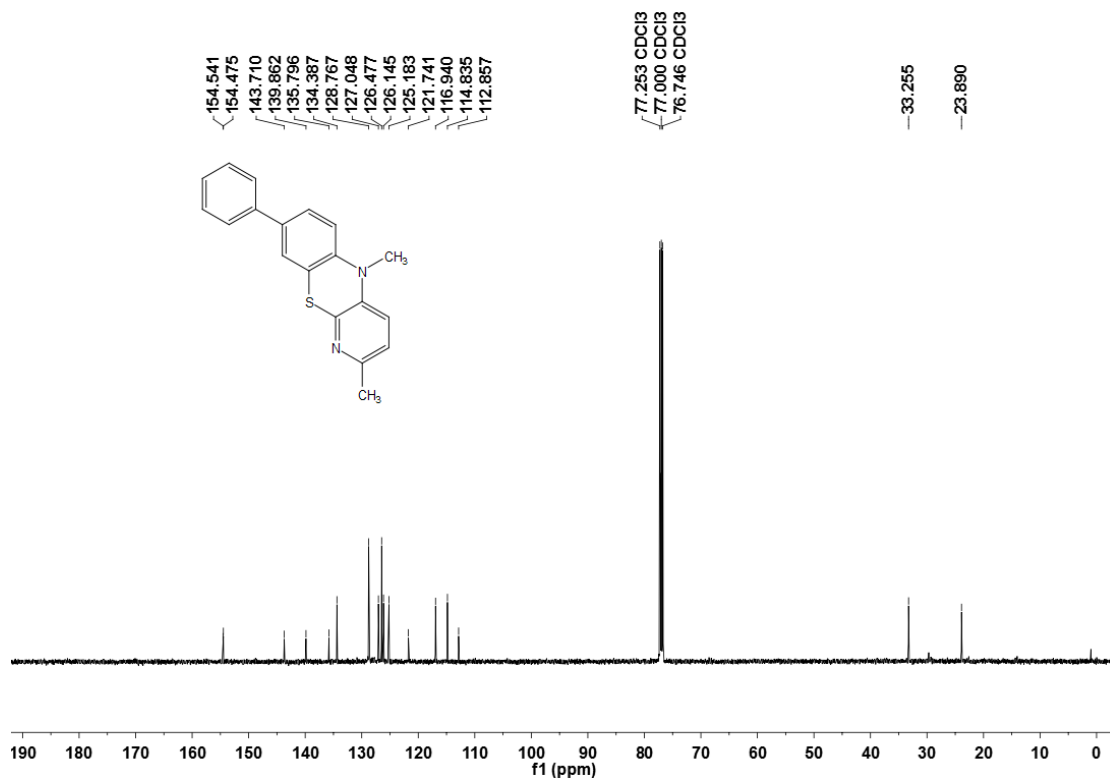

3-chloro-5,8-dimethyl-5H-benzo[b]pyrido[3,2-e][1,4]thiazine (3p)

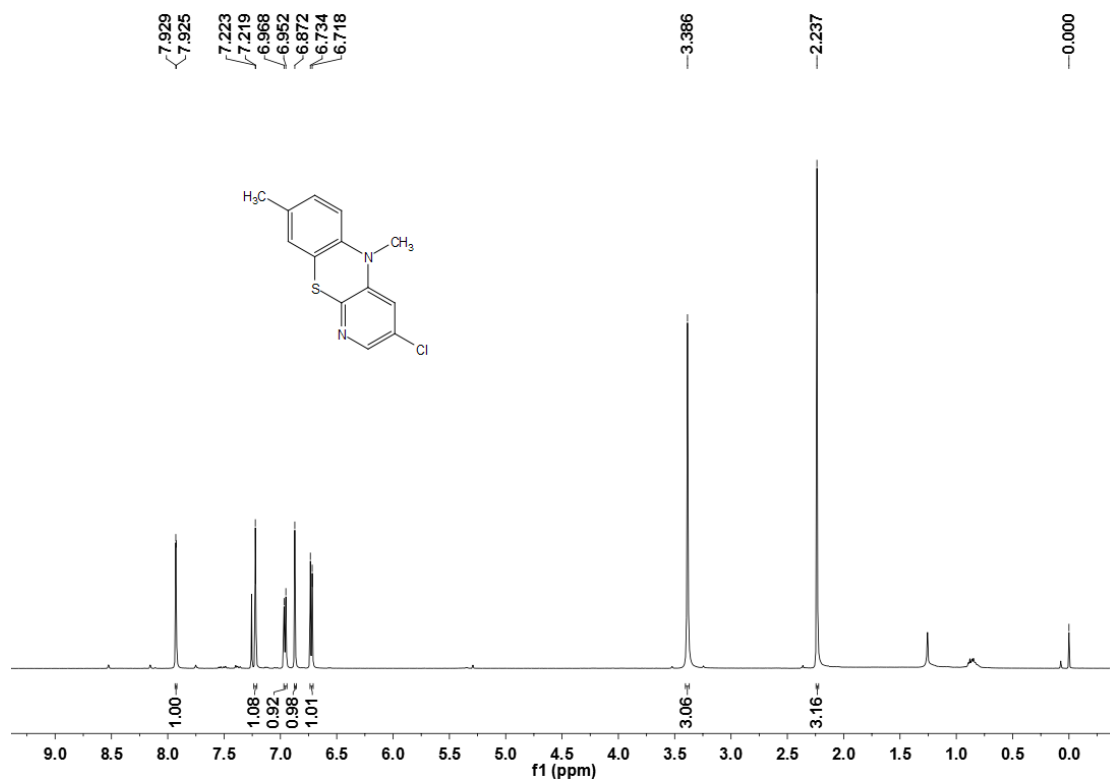

w14-51  
w14-51

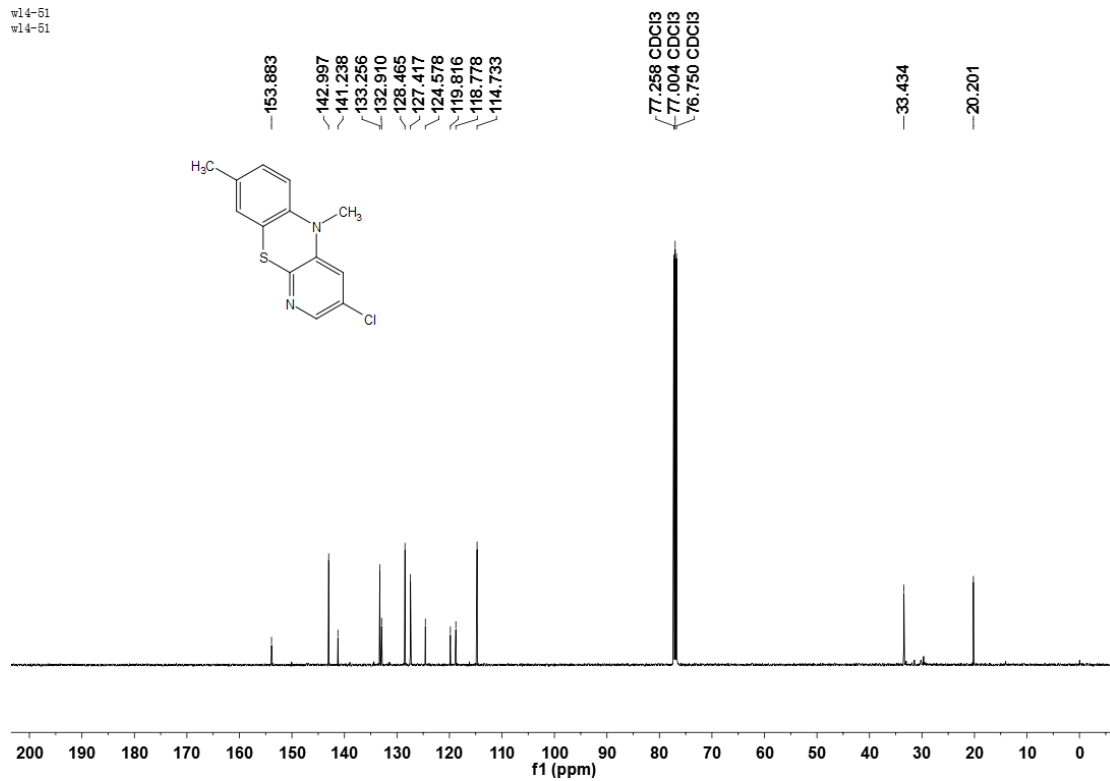

5-methyl-2,3-dihydro-1H-pyrido[3',2':5,6][1,4]thiazino[2,3,4-ij]quinoline (3q)

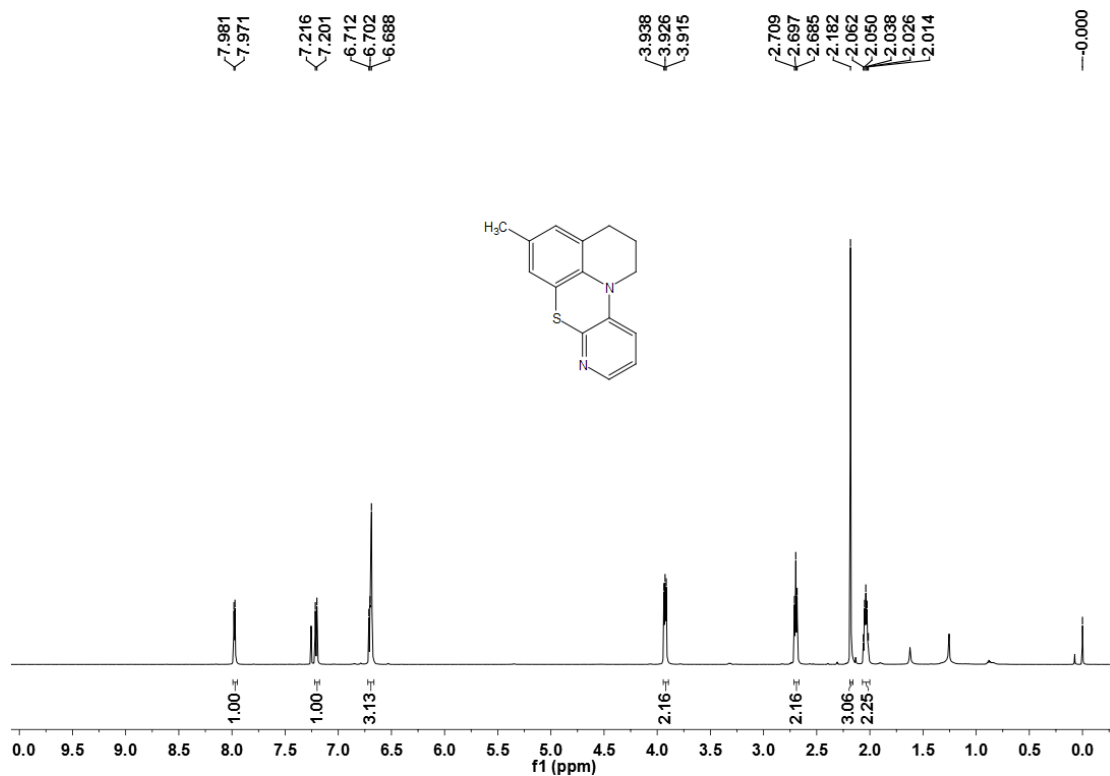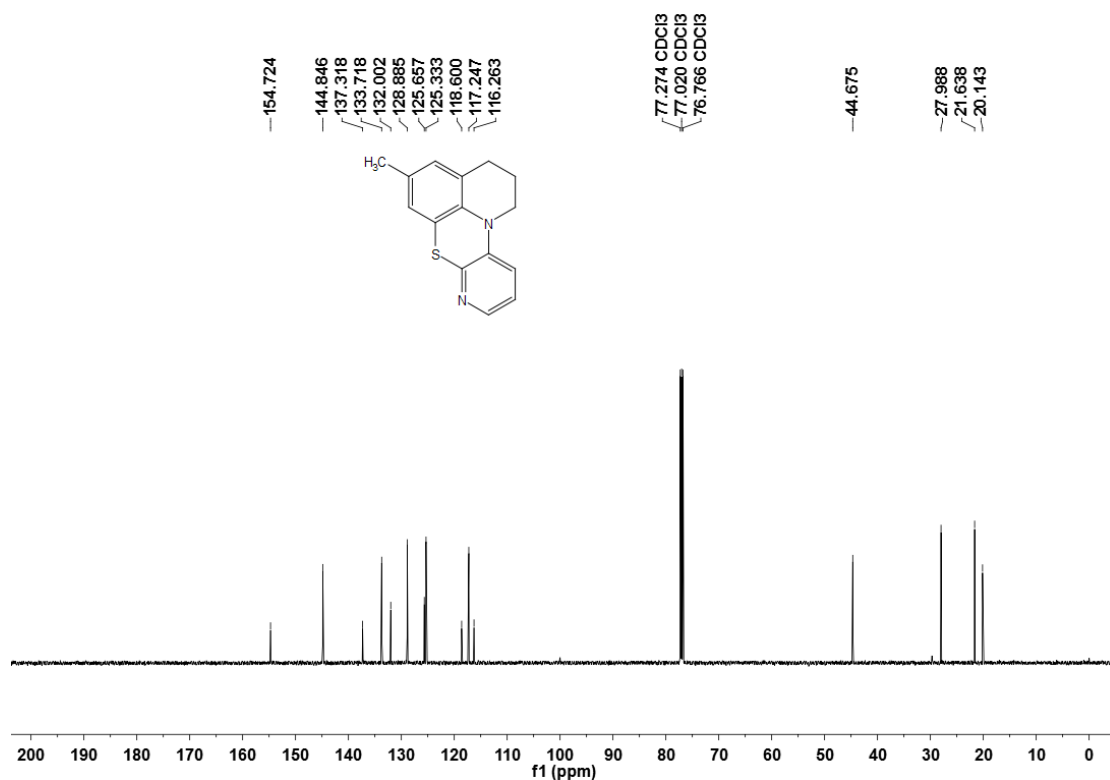

5-methoxy-2,3-dihydro-1H-pyrido[3',2':5,6][1,4]thiazino[2,3,4-ij]quinoline (3r)

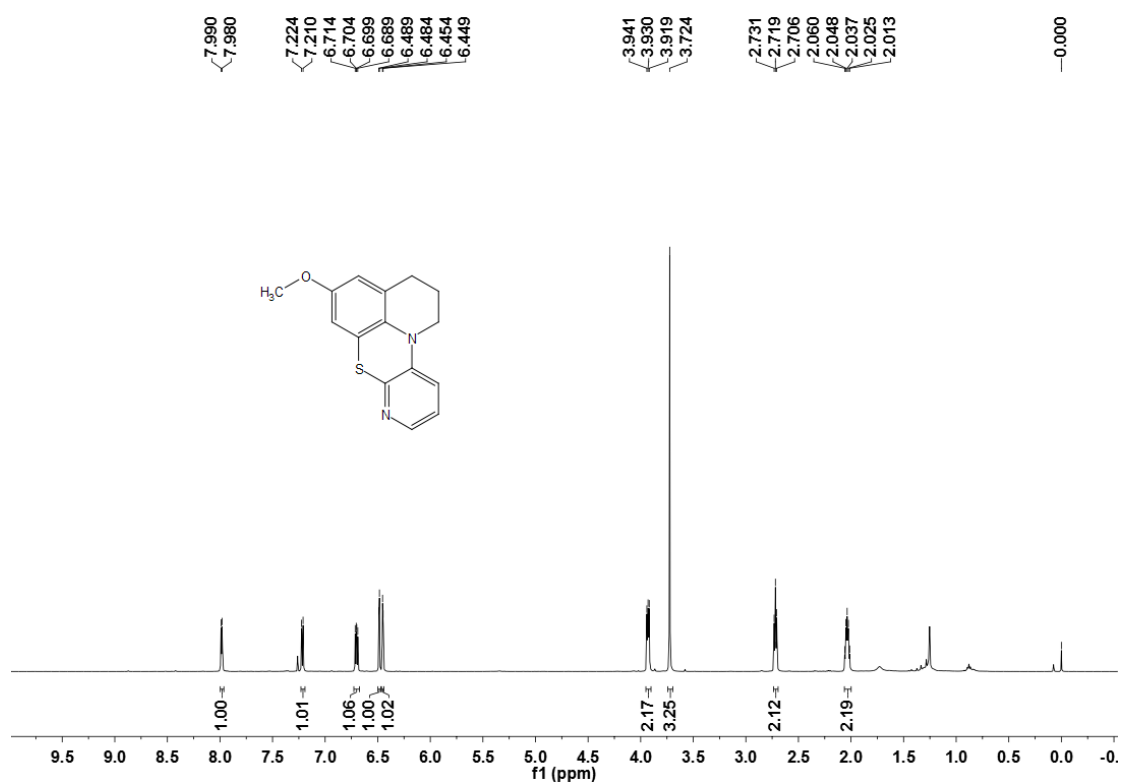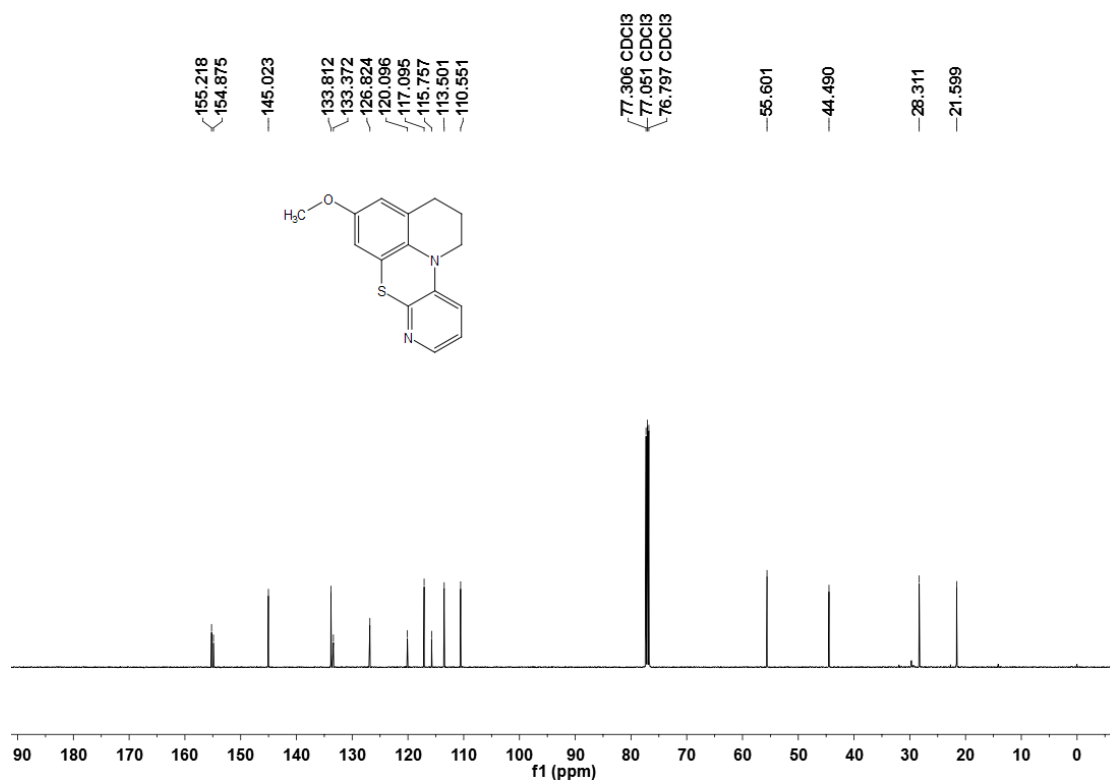

5,9-dimethyl-2,3-dihydro-1H-pyrido[3',2':5,6][1,4]thiazino[2,3,4-ij]quinoline (3s)

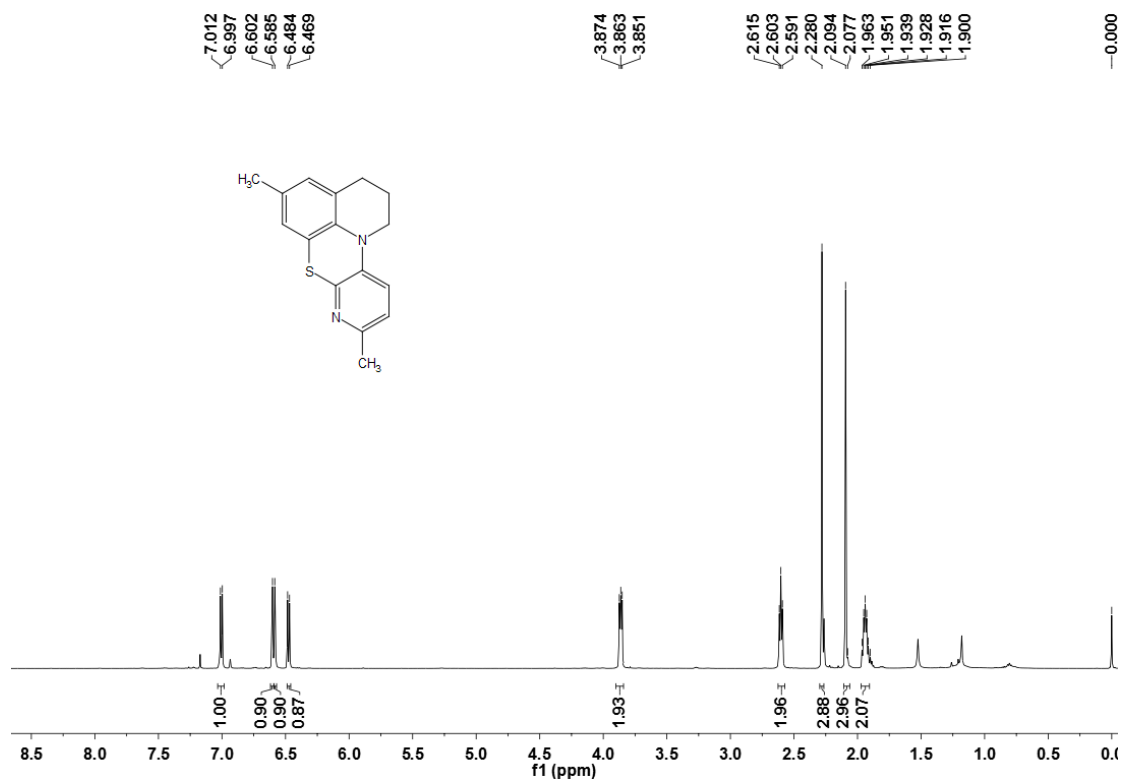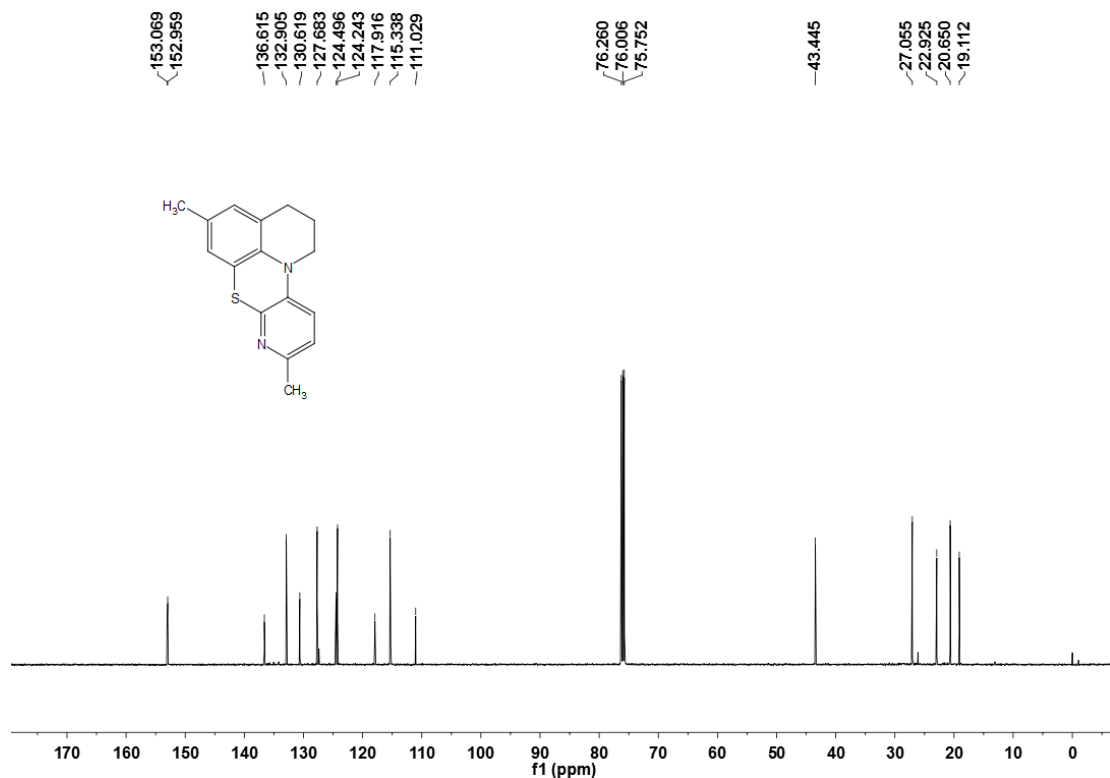

10-chloro-5-methyl-2,3-dihydro-1H-pyrido[3',2':5,6][1,4]thiazino[2,3,4-ij]quinoline (3t)

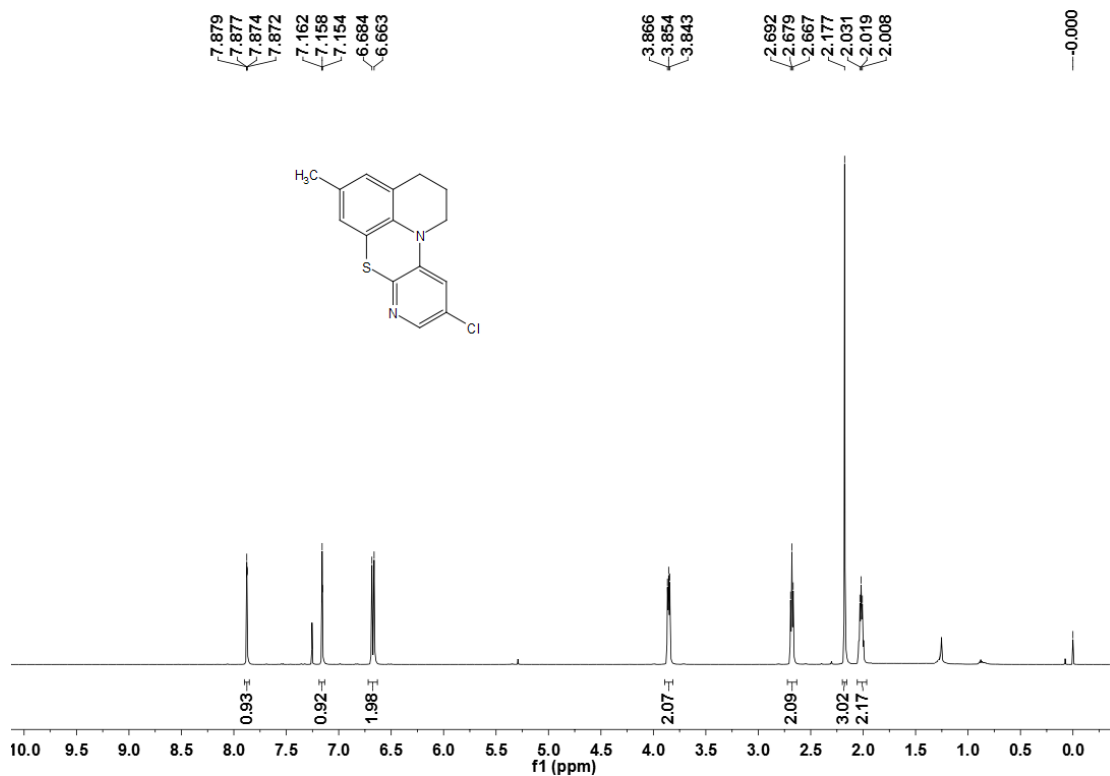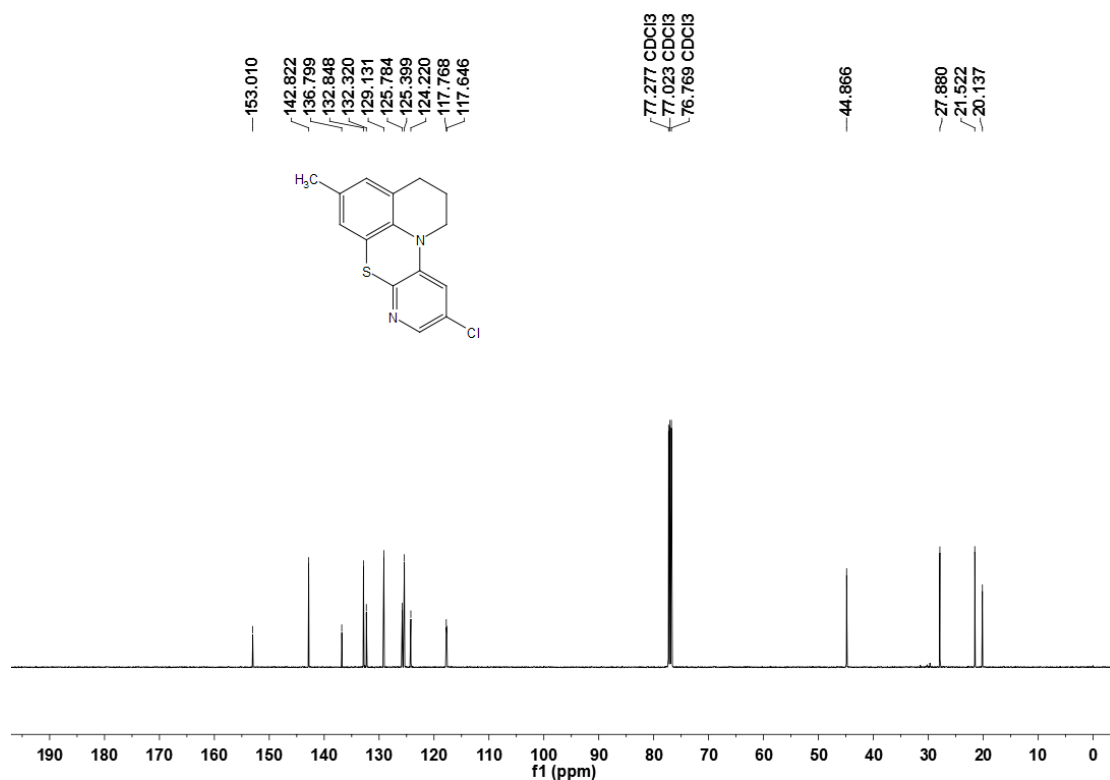

***N*,4-dimethyl-2-(pyridin-2-ylthio)aniline (B)**

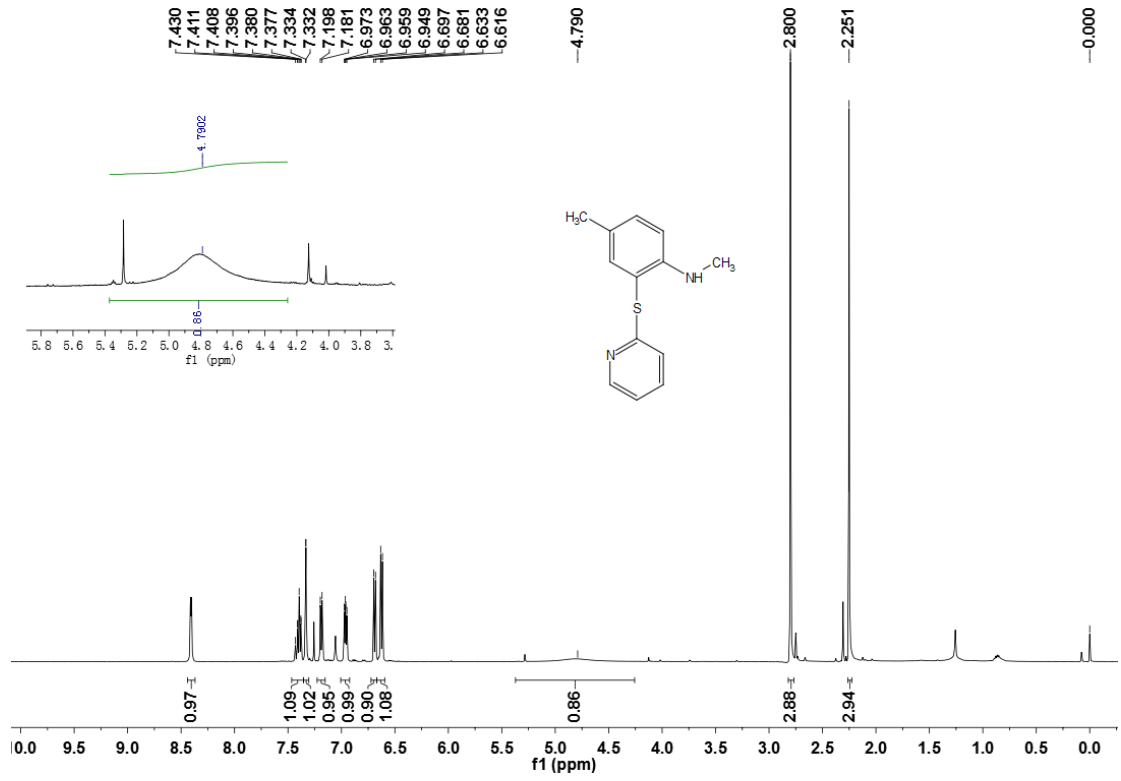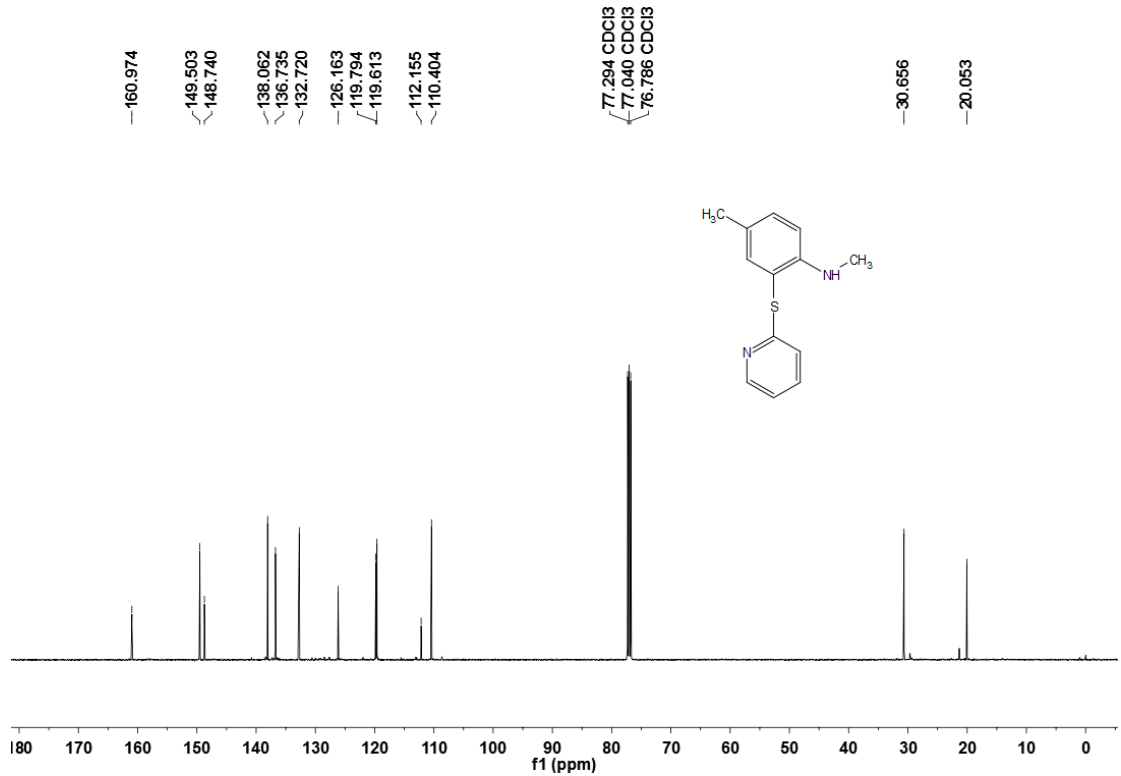

Supplement: c5ra22855g1.pdf [file c5ra22855g1.pdf]
